# Supplementary material
Source: publisher figshare collection journal article supplement (https://tandf.figshare.com/articles/dataset/_/9879284)
Supplement: Supplementary file 1 [file 1]

**Supplemental Material 3. Results from bioinformatic analyses. The results from**

**I: DIANA miRPath v. 3.0 – with TarBase, TargetScan and micro-T CDS-**

**II: KEGG Pathway summary report in miRSystem v.2016**

**III: miRNAs and predicted target genes in PI3k / Akt and fatty acid metabolism in KEGG and Reactome.**

**miRSystem v.2016**

**I: DIANA miRPath v. 3.0 – with TarBase, TargetScan and micro-T CDS-**

a) DIANA miRPath. KEGG pathways, overexpressed miRNAs. Tarbase. FDR p 0.05, conservative stats.

| KEGG pathway                                                            | p-value            | #genes | #miRNAs |
|-------------------------------------------------------------------------|--------------------|--------|---------|
| MicroRNAs in cancer                                                     | 6.0800430848E-053  | 139    | 24      |
| Proteoglycans in cancer                                                 | 4.47238028384E-013 | 163    | 23      |
| Renal cell carcinoma                                                    | 9.4444158425E-009  | 61     | 23      |
| Hepatitis B                                                             | 1.43239063324E-008 | 117    | 23      |
| Pancreatic cancer                                                       | 5.69057185952E-008 | 61     | 22      |
| Protein processing in endoplasmic reticulum                             | 7.0057960447E-008  | 137    | 23      |
| Cell cycle                                                              | 2.46101467727E-007 | 107    | 23      |
| Fatty acid metabolism                                                   | 2.55419793394E-006 | 37     | 21      |
| Ubiquitin mediated proteolysis                                          | 2.55419793394E-006 | 114    | 24      |
| Pathways in cancer                                                      | 0.000006714        | 295    | 24      |
| TGF-beta signaling pathway                                              | 1.31397551801E-005 | 66     | 21      |
| Endocytosis                                                             | 1.80587561185E-005 | 162    | 24      |
| Glycosaminoglycan biosynthesis - chondroitin sulfate / dermatan sulfate | 2.02571096558E-005 | 17     | 12      |
| Prostate cancer                                                         | 2.48763679999E-005 | 77     | 22      |
| p53 signaling pathway                                                   | 2.5241332282E-005  | 63     | 23      |
| Transcriptional misregulation in cancer                                 | 2.74535181528E-005 | 135    | 23      |
| FoxO signaling pathway                                                  | 4.78834978898E-005 | 113    | 23      |
| Chronic myeloid leukemia                                                | 4.78834978898E-005 | 66     | 23      |
| Small cell lung cancer                                                  | 8.45151241523E-005 | 74     | 22      |
| Adherens junction                                                       | 9.67690752731E-005 | 62     | 22      |
| Non-small cell lung cancer                                              | 9.67690752731E-005 | 48     | 22      |
| Colorectal cancer                                                       | 0.0001300855       | 54     | 23      |
| Glycosaminoglycan biosynthesis - keratan sulfate                        | 0.0001857917       | 14     | 12      |
| Hippo signaling pathway                                                 | 0.0004545794       | 110    | 22      |
| Other types of O-glycan biosynthesis                                    | 0.0005215505       | 23     | 18      |
| Prion diseases                                                          | 0.0005215505       | 25     | 21      |
| Epstein-Barr virus infection                                            | 0.0007014133       | 156    | 22      |
| Viral carcinogenesis                                                    | 0.0008359908       | 165    | 23      |
| Glioma                                                                  | 0.0009771701       | 52     | 22      |
| Endometrial cancer                                                      | 0.0015250984       | 45     | 22      |
| ErbB signaling pathway                                                  | 0.0015250984       | 68     | 23      |
| MAPK signaling pathway                                                  | 0.0021346344       | 188    | 23      |

|                                                          |              |     |    |
|----------------------------------------------------------|--------------|-----|----|
| RNA transport                                            | 0.0022359145 | 129 | 23 |
| mTOR signaling pathway                                   | 0.0023013499 | 54  | 22 |
| Fatty acid degradation                                   | 0.0033484053 | 28  | 16 |
| Oocyte meiosis                                           | 0.0033484053 | 84  | 22 |
| Neurotrophin signaling pathway                           | 0.0034569619 | 93  | 23 |
| Phosphatidylinositol signaling system                    | 0.0041427146 | 63  | 22 |
| Acute myeloid leukemia                                   | 0.0046756119 | 48  | 22 |
| Spliceosome                                              | 0.0047303608 | 95  | 22 |
| Thyroid hormone signaling pathway                        | 0.0047303608 | 92  | 22 |
| Bacterial invasion of epithelial cells                   | 0.0047303608 | 61  | 23 |
| N-Glycan biosynthesis                                    | 0.0048857356 | 38  | 18 |
| Central carbon metabolism in cancer                      | 0.006128675  | 54  | 22 |
| Fatty acid elongation                                    | 0.0064130254 | 18  | 16 |
| Lysine degradation                                       | 0.0064163531 | 39  | 21 |
| Focal adhesion                                           | 0.0092435769 | 155 | 23 |
| Signaling pathways regulating pluripotency of stem cells | 0.0096360024 | 104 | 23 |
| Inositol phosphate metabolism                            | 0.0115070838 | 51  | 22 |
| Shigellosis                                              | 0.0115070838 | 52  | 23 |
| Glycosylphosphatidylinositol(GPI)-anchor biosynthesis    | 0.0117354742 | 22  | 16 |
| Thyroid cancer                                           | 0.0155024708 | 25  | 22 |
| Insulin signaling pathway                                | 0.0170152572 | 106 | 23 |
| Melanoma                                                 | 0.0209452615 | 55  | 23 |
| Apoptosis                                                | 0.0209554027 | 69  | 22 |
| Progesterone-mediated oocyte maturation                  | 0.0224035802 | 69  | 22 |
| Sphingolipid signaling pathway                           | 0.0299312683 | 87  | 23 |
| Axon guidance                                            | 0.0329859637 | 93  | 22 |
| TNF signaling pathway                                    | 0.0329859637 | 84  | 24 |
| Pyrimidine metabolism                                    | 0.0331857043 | 76  | 22 |
| Lysosome                                                 | 0.0331857043 | 88  | 22 |
| PI3K-Akt signaling pathway                               | 0.0343396695 | 229 | 23 |
| DNA replication                                          | 0.0343836113 | 29  | 15 |
| Chagas disease (American trypanosomiasis)                | 0.0443312449 | 77  | 22 |

b) DIANA + TargetScan. Overexpressed miRNAs. Context score -0.4, FDR, conservative stats and p 0.05

| KEGG pathway                                               | p-value            | #genes | #miRNAs |
|------------------------------------------------------------|--------------------|--------|---------|
| Fatty acid biosynthesis                                    | 3.55093059276E-030 | 3      | 4       |
| Prion diseases                                             | 2.51619786355E-022 | 4      | 6       |
| Fatty acid metabolism                                      | 3.07474808279E-015 | 7      | 8       |
| Glycosphingolipid biosynthesis - lacto and neolacto series | 0.0131221549       | 3      | 3       |
| Mucin type O-Glycan biosynthesis                           | 0.0181820424       | 6      | 7       |
| Cytokine-cytokine receptor interaction                     | 0.0181833996       | 31     | 17      |
| PI3K-Akt signaling pathway                                 | 0.0181833996       | 47     | 22      |
| Glycosaminoglycan biosynthesis - heparan sulfate / heparin | 0.0446098753       | 3      | 6       |

c) DIANA + microT-CDS. Overexpressed miRNAs. MicroT Threshold 0.8

| KEGG pathway            | p-value            | #genes | #miRNAs |
|-------------------------|--------------------|--------|---------|
| Fatty acid biosynthesis | 1.11889144973E-009 | 8      | 8       |

|                                                          |                    |     |    |
|----------------------------------------------------------|--------------------|-----|----|
| Mucin type O-Glycan biosynthesis                         | 2.84293839002E-008 | 17  | 15 |
| Pathways in cancer                                       | 1.15223904047E-006 | 199 | 23 |
| Proteoglycans in cancer                                  | 1.16457575633E-006 | 103 | 23 |
| MAPK signaling pathway                                   | 1.70916043456E-005 | 137 | 24 |
| Signaling pathways regulating pluripotency of stem cells | 1.96231012205E-005 | 79  | 24 |
| Axon guidance                                            | 2.13652796158E-005 | 75  | 22 |
| Thyroid hormone signaling pathway                        | 3.212068906E-005   | 65  | 23 |
| Rap1 signaling pathway                                   | 4.56119262949E-005 | 114 | 23 |
| Prion diseases                                           | 0.000058103        | 12  | 14 |
| Renal cell carcinoma                                     | 6.35216735341E-005 | 42  | 22 |
| Ras signaling pathway                                    | 0.0001178121       | 114 | 22 |
| Long-term depression                                     | 0.0001399584       | 37  | 20 |
| ErbB signaling pathway                                   | 0.000297166        | 52  | 22 |
| PI3K-Akt signaling pathway                               | 0.000297166        | 169 | 23 |
| Prostate cancer                                          | 0.0004776205       | 53  | 23 |
| Glioma                                                   | 0.0005583944       | 37  | 22 |
| Hippo signaling pathway                                  | 0.0007176661       | 77  | 22 |
| Melanoma                                                 | 0.0007176661       | 44  | 22 |
| Glutamatergic synapse                                    | 0.0007283007       | 60  | 22 |
| Non-small cell lung cancer                               | 0.0010426908       | 34  | 19 |
| TGF-beta signaling pathway                               | 0.0010426908       | 45  | 21 |
| FoxO signaling pathway                                   | 0.0014185679       | 73  | 22 |
| Colorectal cancer                                        | 0.0014283738       | 35  | 20 |
| Gap junction                                             | 0.0014283738       | 49  | 22 |
| Adherens junction                                        | 0.0014659518       | 44  | 21 |
| Oxytocin signaling pathway                               | 0.0017371508       | 83  | 23 |
| Focal adhesion                                           | 0.0023912746       | 106 | 23 |
| Neurotrophin signaling pathway                           | 0.0026911488       | 66  | 23 |
| Regulation of actin cytoskeleton                         | 0.0029738217       | 111 | 22 |
| Choline metabolism in cancer                             | 0.0029738217       | 57  | 22 |
| N-Glycan biosynthesis                                    | 0.0036893768       | 24  | 16 |
| Endometrial cancer                                       | 0.0050747077       | 32  | 20 |
| Tight junction                                           | 0.0061730605       | 72  | 23 |
| Adrenergic signaling in cardiomyocytes                   | 0.0070711804       | 71  | 23 |
| p53 signaling pathway                                    | 0.0081876308       | 39  | 20 |
| Pancreatic cancer                                        | 0.009425463        | 38  | 20 |
| Chronic myeloid leukemia                                 | 0.0096394863       | 41  | 23 |
| Prolactin signaling pathway                              | 0.0110343244       | 39  | 20 |
| Ubiquitin mediated proteolysis                           | 0.0168482958       | 71  | 24 |
| Sphingolipid signaling pathway                           | 0.0257373139       | 61  | 22 |
| Wnt signaling pathway                                    | 0.0335578825       | 69  | 22 |
| ECM-receptor interaction                                 | 0.0377411885       | 38  | 20 |
| Endocytosis                                              | 0.0377411885       | 98  | 22 |
| mTOR signaling pathway                                   | 0.0395918749       | 35  | 20 |

d) Diana + Tarbase. KEGG. Downregulated miRNAs.

| KEGG pathway            | p-value            | #genes | #miRNAs |
|-------------------------|--------------------|--------|---------|
| MicroRNAs in cancer     | 1.04218336742E-061 | 104    | 11      |
| Proteoglycans in cancer | 1.91745701273E-011 | 104    | 11      |

|                                                        |                    |     |    |
|--------------------------------------------------------|--------------------|-----|----|
| Fatty acid metabolism                                  | 3.64806861495E-008 | 22  | 10 |
| Lysine degradation                                     | 1.36782648056E-007 | 29  | 11 |
| Protein processing in endoplasmic reticulum            | 4.37410913424E-007 | 88  | 11 |
| Colorectal cancer                                      | 7.22137750536E-007 | 39  | 11 |
| Cell cycle                                             | 1.15136074135E-006 | 67  | 11 |
| Adherens junction                                      | 1.25206305599E-006 | 41  | 11 |
| Fatty acid biosynthesis                                | 1.95739861294E-006 | 6   | 8  |
| Hepatitis B                                            | 2.78125145325E-006 | 72  | 11 |
| Hippo signaling pathway                                | 2.93793121997E-006 | 65  | 11 |
| FoxO signaling pathway                                 | 9.30614264531E-006 | 73  | 11 |
| Pancreatic cancer                                      | 1.02678918883E-005 | 41  | 11 |
| Glioma                                                 | 1.17652567901E-005 | 36  | 11 |
| Prostate cancer                                        | 2.93598021567E-005 | 52  | 11 |
| Endometrial cancer                                     | 3.67443525449E-005 | 32  | 11 |
| Central carbon metabolism in cancer                    | 3.67443525449E-005 | 36  | 11 |
| Viral carcinogenesis                                   | 5.12394914699E-005 | 93  | 11 |
| Spliceosome                                            | 9.19036992581E-005 | 64  | 11 |
| Thyroid hormone signaling pathway                      | 9.19036992581E-005 | 58  | 11 |
| Neurotrophin signaling pathway                         | 0.000101363        | 63  | 11 |
| Ubiquitin mediated proteolysis                         | 0.0001119049       | 72  | 11 |
| Estrogen signaling pathway                             | 0.0001120435       | 50  | 11 |
| Chronic myeloid leukemia                               | 0.0001462347       | 41  | 11 |
| Non-small cell lung cancer                             | 0.0001472632       | 32  | 11 |
| p53 signaling pathway                                  | 0.0001850886       | 41  | 11 |
| Renal cell carcinoma                                   | 0.0006005235       | 37  | 11 |
| Biosynthesis of unsaturated fatty acids                | 0.0009605068       | 12  | 9  |
| TGF-beta signaling pathway                             | 0.0011070787       | 39  | 11 |
| ErbB signaling pathway                                 | 0.001211141        | 42  | 11 |
| RNA transport                                          | 0.001548655        | 78  | 11 |
| Pathways in cancer                                     | 0.001548655        | 163 | 11 |
| Regulation of actin cytoskeleton                       | 0.0030158197       | 91  | 11 |
| Oocyte meiosis                                         | 0.0034169746       | 52  | 11 |
| Phosphatidylinositol signaling system                  | 0.0034169746       | 41  | 11 |
| Focal adhesion                                         | 0.0034169746       | 94  | 11 |
| Small cell lung cancer                                 | 0.0050852206       | 43  | 11 |
| Thyroid cancer                                         | 0.0065945316       | 16  | 11 |
| mRNA surveillance pathway                              | 0.0080242407       | 44  | 11 |
| TNF signaling pathway                                  | 0.0080242407       | 54  | 11 |
| Epstein-Barr virus infection                           | 0.0087088388       | 93  | 11 |
| Bladder cancer                                         | 0.0096383971       | 23  | 11 |
| Progesterone-mediated oocyte maturation                | 0.0106482898       | 43  | 11 |
| Bacterial invasion of epithelial cells                 | 0.0106482898       | 36  | 11 |
| mTOR signaling pathway                                 | 0.0108534042       | 34  | 11 |
| Prolactin signaling pathway                            | 0.0134001283       | 34  | 11 |
| AMPK signaling pathway                                 | 0.0135419823       | 57  | 11 |
| Fatty acid elongation                                  | 0.0160639187       | 11  | 8  |
| HIF-1 signaling pathway                                | 0.0226623394       | 49  | 11 |
| Choline metabolism in cancer                           | 0.025074804        | 46  | 11 |
| Arrhythmogenic right ventricular cardiomyopathy (ARVC) | 0.0345817991       | 24  | 11 |
| PI3K-Akt signaling pathway                             | 0.0368458226       | 127 | 11 |

|                                                          |              |     |    |
|----------------------------------------------------------|--------------|-----|----|
| Endocytosis                                              | 0.0410506425 | 84  | 11 |
| Wnt signaling pathway                                    | 0.0410506425 | 59  | 11 |
| HTLV-I infection                                         | 0.0423373556 | 106 | 11 |
| MAPK signaling pathway                                   | 0.0437025212 | 101 | 11 |
| Insulin signaling pathway                                | 0.0450318224 | 61  | 11 |
| Signaling pathways regulating pluripotency of stem cells | 0.0478400082 | 59  | 11 |
| Melanoma                                                 | 0.0478400082 | 32  | 11 |

e) DIANA + Targetscan. Downregulated microRNAs. Context score -0.4

| KEGG pathway                                               | p-value       | #genes | #miRNAs |
|------------------------------------------------------------|---------------|--------|---------|
| Fatty acid biosynthesis                                    | <1E-325       | 2      | 2       |
| ECM-receptor interaction                                   | <1E-325       | 19     | 5       |
| Mucin type O-Glycan biosynthesis                           | 3.109805E-006 | 1      | 2       |
| Fatty acid metabolism                                      | 4.098023E-005 | 6      | 2       |
| Glycosphingolipid biosynthesis - lacto and neolacto series | 0.008277265   | 1      | 1       |
| Proteoglycans in cancer                                    | 0.008487167   | 38     | 2       |
| Steroid hormone biosynthesis                               | 0.01982273    | 1      | 2       |
| Adherens junction                                          | 0.03674103    | 14     | 3       |

f) DIANA + microT-CDS. Downregulated microRNAs. MicroT Threshold 0.8

| KEGG pathway                                             | p-value            | #genes | #miRNAs |
|----------------------------------------------------------|--------------------|--------|---------|
| Mucin type O-Glycan biosynthesis                         | 2.07137645133E-005 | 8      | 6       |
| FoxO signaling pathway                                   | 0.0005386679       | 38     | 8       |
| Neurotrophin signaling pathway                           | 0.0005386679       | 37     | 10      |
| MAPK signaling pathway                                   | 0.0005386679       | 64     | 11      |
| Arrhythmogenic right ventricular cardiomyopathy (ARVC)   | 0.0331443028       | 21     | 5       |
| Axon guidance                                            | 0.0331443028       | 33     | 7       |
| Long-term depression                                     | 0.0331443028       | 17     | 7       |
| Amphetamine addiction                                    | 0.0331443028       | 16     | 7       |
| N-Glycan biosynthesis                                    | 0.0331443028       | 12     | 8       |
| B cell receptor signaling pathway                        | 0.0331443028       | 22     | 9       |
| Non-small cell lung cancer                               | 0.0392900667       | 16     | 8       |
| Ras signaling pathway                                    | 0.0392900667       | 46     | 10      |
| Hippo signaling pathway                                  | 0.0408059962       | 25     | 7       |
| Ubiquitin mediated proteolysis                           | 0.0408059962       | 35     | 8       |
| Glioma                                                   | 0.0408059962       | 16     | 8       |
| Prostate cancer                                          | 0.0408059962       | 22     | 8       |
| Signaling pathways regulating pluripotency of stem cells | 0.0408059962       | 33     | 10      |
| Regulation of actin cytoskeleton                         | 0.0412588654       | 47     | 8       |

## II: KEGG Pathway summary report in miRSystem v.2016

a) MiRSystem. Overexpressed miRNAs. KEGG Pathway ranking summary report.

| KEGG pathway                                | Total Genes Of The Term | Union Targets In The Term | Mirs In The Term | Score |
|---------------------------------------------|-------------------------|---------------------------|------------------|-------|
| Pathways_In_Cancer                          | 325                     | 145                       | 22               | 3.487 |
| Axon_Guidance                               | 129                     | 68                        | 20               | 2.682 |
| MAPK_Signaling_Pathway                      | 272                     | 114                       | 21               | 2.636 |
| Focal_Adhesion                              | 199                     | 78                        | 20               | 2.196 |
| Prostate_Cancer                             | 89                      | 45                        | 20               | 2.166 |
| Neurotrophin_Signaling_Pathway              | 127                     | 66                        | 20               | 2.105 |
| Melanoma                                    | 71                      | 38                        | 21               | 2.036 |
| Wnt_Signaling_Pathway                       | 150                     | 73                        | 21               | 2.033 |
| Pancreatic_Cancer                           | 70                      | 39                        | 21               | 1.923 |
| Renal_Cell_Carcinoma                        | 70                      | 38                        | 17               | 1.908 |
| Glioma                                      | 65                      | 33                        | 21               | 1.884 |
| TGF-Beta_Signaling_Pathway                  | 84                      | 44                        | 19               | 1.873 |
| Chronic_Myeloid_Leukemia                    | 73                      | 40                        | 22               | 1.868 |
| Regulation_Of_Actin_Cytoskeleton            | 213                     | 89                        | 21               | 1.849 |
| Endocytosis                                 | 201                     | 83                        | 20               | 1.832 |
| Ubiquitin_Mediated_Proteolysis              | 135                     | 53                        | 19               | 1.632 |
| ErbB_Signaling_Pathway                      | 87                      | 43                        | 19               | 1.628 |
| T_Cell_Receptor_Signaling_Pathway           | 108                     | 48                        | 20               | 1.569 |
| Insulin_Signaling_Pathway                   | 137                     | 52                        | 19               | 1.567 |
| Small_Cell_Lung_Cancer                      | 84                      | 36                        | 20               | 1.531 |
| Adherens_Junction                           | 73                      | 36                        | 18               | 1.443 |
| Non-Small_Cell_Lung_Cancer                  | 54                      | 29                        | 21               | 1.39  |
| mTOR_Signaling_Pathway                      | 52                      | 23                        | 18               | 1.349 |
| Colorectal_Cancer                           | 62                      | 33                        | 18               | 1.33  |
| P53_Signaling_Pathway                       | 68                      | 33                        | 18               | 1.324 |
| Cell_Cycle                                  | 124                     | 47                        | 21               | 1.316 |
| Progesterone-Mediated_Oocyte_Maturation     | 86                      | 34                        | 20               | 1.308 |
| Oocyte_Meiosis                              | 112                     | 45                        | 19               | 1.305 |
| Long-Term_Potentialiation                   | 70                      | 33                        | 17               | 1.253 |
| Fc_Gamma_R-Mediated_Phagocytosis            | 94                      | 40                        | 19               | 1.22  |
| Chagas_Disease                              | 104                     | 43                        | 18               | 1.185 |
| Vegf_Signaling_Pathway                      | 76                      | 29                        | 17               | 1.173 |
| Aldosterone-Regulated_Sodium_Reabsorption   | 42                      | 21                        | 17               | 1.168 |
| Melanogenesis                               | 101                     | 45                        | 18               | 1.16  |
| Cytokine-Cytokine_Receptor_Interaction      | 275                     | 61                        | 21               | 1.114 |
| Jak-Stat_Signaling_Pathway                  | 155                     | 45                        | 21               | 1.105 |
| Acute_Myeloid_Leukemia                      | 57                      | 27                        | 18               | 1.104 |
| Chemokine_Signaling_Pathway                 | 189                     | 63                        | 19               | 1.09  |
| Protein_Processing_In_Endoplasmic_Reticulum | 166                     | 46                        | 17               | 1.069 |
| Gap_Junction                                | 90                      | 35                        | 16               | 1.048 |

|                                                                |     |    |    |       |
|----------------------------------------------------------------|-----|----|----|-------|
| B_Cell_Receptor_Signaling_Pathway                              | 75  | 27 | 17 | 1.035 |
| Calcium_Signaling_Pathway                                      | 177 | 46 | 20 | 0.993 |
| Adipocytokine_Signaling_Pathway                                | 68  | 23 | 15 | 0.974 |
| Bladder_Cancer                                                 | 42  | 21 | 16 | 0.973 |
| Phosphatidylinositol_Signaling_System                          | 78  | 29 | 17 | 0.97  |
| Tight_Junction                                                 | 132 | 51 | 18 | 0.968 |
| Amyotrophic_Lateral_Sclerosis_(Als)                            | 54  | 23 | 16 | 0.939 |
| Bacterial_Invasion_Of_Epithelial_Cells                         | 70  | 24 | 19 | 0.931 |
| Dilated_Cardiomyopathy                                         | 90  | 36 | 16 | 0.928 |
| Gastric_Acid_Secretion                                         | 74  | 30 | 16 | 0.922 |
| Type_Ii_Diabetes_Mellitus                                      | 47  | 19 | 17 | 0.92  |
| Endometrial_Cancer                                             | 52  | 22 | 15 | 0.91  |
| Apoptosis                                                      | 88  | 31 | 20 | 0.906 |
| Shigellosis                                                    | 61  | 26 | 17 | 0.89  |
| Toxoplasmosis                                                  | 132 | 38 | 18 | 0.89  |
| Hypertrophic_Cardiomyopathy_(Hcm)                              | 87  | 31 | 17 | 0.851 |
| Vascular_Smooth_Muscle_Contraction                             | 126 | 39 | 18 | 0.827 |
| Leukocyte_Transendothelial_Migration                           | 116 | 34 | 19 | 0.825 |
| Notch_Signaling_Pathway                                        | 47  | 20 | 15 | 0.815 |
| Gnrh_Signaling_Pathway                                         | 101 | 37 | 16 | 0.805 |
| Fc_Epsilon_Ri_Signaling_Pathway                                | 79  | 29 | 16 | 0.803 |
| Hepatitis_C                                                    | 134 | 39 | 19 | 0.794 |
| Salivary_Secretion                                             | 89  | 28 | 14 | 0.79  |
| Toll-Like_Receptor_Signaling_Pathway                           | 102 | 28 | 16 | 0.78  |
| Pancreatic_Secretion                                           | 103 | 27 | 15 | 0.763 |
| Long-Term_Depression                                           | 70  | 25 | 15 | 0.755 |
| Olfactory_Transduction                                         | 388 | 7  | 8  | 0.753 |
| Arrhythmogenic_Right_Ventricular_Cardiomyopathy_(A<br>rvc)     | 74  | 27 | 14 | 0.731 |
| Huntington's_Disease                                           | 183 | 37 | 20 | 0.729 |
| Hedgehog_Signaling_Pathway                                     | 56  | 22 | 12 | 0.722 |
| Cell_Adhesion_Molecules_(Cams)                                 | 133 | 30 | 17 | 0.69  |
| Natural_Killer_Cell_Mediated_Cytotoxicity                      | 140 | 28 | 16 | 0.667 |
| Amoebiasis                                                     | 105 | 30 | 17 | 0.666 |
| Inositol_Phosphate_Metabolism                                  | 57  | 19 | 12 | 0.654 |
| Neuroactive_Ligand-Receptor_Interaction                        | 318 | 46 | 16 | 0.644 |
| Ecm-Receptor_Interaction                                       | 84  | 25 | 15 | 0.633 |
| Snare_Interactions_In_Vesicular_Transport                      | 36  | 16 | 11 | 0.632 |
| Epithelial_Cell_Signaling_In_Helicobacter_Pylori_Infect<br>ion | 68  | 22 | 16 | 0.6   |
| Thyroid_Cancer                                                 | 29  | 12 | 11 | 0.599 |
| Viral_Myocarditis                                              | 70  | 19 | 11 | 0.586 |
| Vasopressin-Regulated_Water_Reabsorption                       | 44  | 17 | 12 | 0.582 |
| Basal_Cell_Carcinoma                                           | 55  | 21 | 16 | 0.58  |
| Rna_Transport                                                  | 144 | 30 | 17 | 0.551 |
| Spliceosome                                                    | 127 | 22 | 15 | 0.537 |
| Nod-Like_Receptor_Signaling_Pathway                            | 62  | 16 | 16 | 0.524 |
| Carbohydrate_Digestion_And_Absorption                          | 43  | 11 | 15 | 0.522 |
| Protein_Digestion_And_Absorption                               | 80  | 20 | 15 | 0.494 |
| Rna_Degradation                                                | 57  | 12 | 12 | 0.487 |



|                                                          |     |    |    |       |
|----------------------------------------------------------|-----|----|----|-------|
| Lysosome                                                 | 121 | 24 | 14 | 0.482 |
| Alzheimer's_Disease                                      | 168 | 34 | 15 | 0.481 |
| Basal_Transcription_Factors                              | 35  | 12 | 13 | 0.468 |
| Phagosome                                                | 154 | 29 | 15 | 0.45  |
| Cardiac_Muscle_Contraction                               | 77  | 19 | 15 | 0.449 |
| Purine_Metabolism                                        | 161 | 23 | 15 | 0.448 |
| Rig-I-Like_Receptor_Signaling_Pathway                    | 71  | 19 | 14 | 0.444 |
| N-Glycan_Biosynthesis                                    | 49  | 14 | 10 | 0.429 |
| Prion_Diseases                                           | 36  | 11 | 10 | 0.414 |
| O-Glycan_Biosynthesis                                    | 30  | 10 | 9  | 0.412 |
| Glycosaminoglycan_Biosynthesis_Heparan_Sulfate           | 26  | 7  | 6  | 0.404 |
| Leishmaniasis                                            | 72  | 17 | 12 | 0.396 |
| Glycosphingolipid_Biosynthesis_Lacto_And_Neolacto_Series | 26  | 8  | 7  | 0.366 |
| Hematopoietic_Cell_Lineage                               | 88  | 18 | 12 | 0.356 |
| PPAR_Signaling_Pathway                                   | 70  | 13 | 11 | 0.353 |
| Parkinson's_Disease                                      | 130 | 14 | 13 | 0.349 |
| Peroxisome                                               | 79  | 13 | 12 | 0.349 |
| Vibrio_Cholerae_Infection                                | 54  | 14 | 9  | 0.339 |
| Nucleotide_Excision_Repair                               | 44  | 9  | 9  | 0.302 |
| Pathogenic_Escherichia_Coli_Infection                    | 56  | 12 | 10 | 0.301 |
| Type_I_Diabetes_Mellitus                                 | 43  | 9  | 7  | 0.3   |
| Sphingolipid_Metabolism                                  | 40  | 12 | 10 | 0.299 |
| Regulation_Of_Autophagy                                  | 34  | 7  | 8  | 0.293 |
| Cysteine_And_Methionine_Metabolism                       | 36  | 7  | 11 | 0.288 |
| Abc_Transporters                                         | 44  | 7  | 9  | 0.265 |
| Allograft_Rejection                                      | 37  | 8  | 6  | 0.265 |
| Systemic_Lupus_Erythematosus                             | 136 | 9  | 8  | 0.264 |
| Maturity_Onset_Diabetes_Of_The_Young                     | 25  | 7  | 6  | 0.257 |
| Malaria                                                  | 51  | 8  | 9  | 0.255 |
| Lysine_Degradation                                       | 44  | 10 | 10 | 0.251 |
| Graft-Versus-Host_Disease                                | 41  | 7  | 6  | 0.25  |
| Intestinal_Immune_Network_For_Iga_Production             | 48  | 7  | 7  | 0.244 |
| Pyrimidine_Metabolism                                    | 99  | 9  | 8  | 0.224 |
| Antigen_Processing_And_Presentation                      | 76  | 11 | 8  | 0.214 |
| Glycerophospholipid_Metabolism                           | 79  | 14 | 6  | 0.214 |
| Citrate_Cycle_(Tca_Cycle)                                | 31  | 5  | 7  | 0.205 |
| Galactose_Metabolism                                     | 26  | 4  | 7  | 0.205 |
| Fructose_And_Mannose_Metabolism                          | 34  | 7  | 8  | 0.202 |
| Selenoamino_Acid_Metabolism                              | 26  | 3  | 9  | 0.195 |
| Fatty_Acid_Metabolism                                    | 43  | 6  | 6  | 0.19  |
| Collecting_Duct_Acid_Secretion                           | 27  | 5  | 4  | 0.171 |
| Autoimmune_Thyroid_Disease                               | 52  | 5  | 4  | 0.164 |
| Glycerolipid_Metabolism                                  | 49  | 7  | 6  | 0.16  |
| Oxidative_Phosphorylation                                | 132 | 9  | 6  | 0.16  |
| Starch_And_Sucrose_Metabolism                            | 53  | 4  | 7  | 0.153 |
| Amino_Sugar_And_Nucleotide_Sugar_Metabolism              | 47  | 7  | 6  | 0.149 |
| Complement_And_Coagulation_Cascades                      | 69  | 5  | 6  | 0.139 |
| Taste_Transduction                                       | 52  | 5  | 6  | 0.139 |
| Dna_Replication                                          | 36  | 5  | 5  | 0.133 |



|                                                       |    |   |   |       |
|-------------------------------------------------------|----|---|---|-------|
| Pentose_Phosphate_Pathway                             | 26 | 3 | 4 | 0.133 |
| Homologous_Recombination                              | 28 | 4 | 3 | 0.125 |
| Arginine_And_Proline_Metabolism                       | 54 | 8 | 5 | 0.123 |
| Base_Excision_Repair                                  | 33 | 4 | 4 | 0.119 |
| Glycolysis_Gluconeogenesis                            | 65 | 4 | 5 | 0.116 |
| Retinol_Metabolism                                    | 65 | 5 | 4 | 0.107 |
| Cytosolic_Dna-Sensing_Pathway                         | 56 | 4 | 5 | 0.096 |
| Proteasome                                            | 44 | 4 | 4 | 0.096 |
| Ether_Lipid_Metabolism                                | 35 | 4 | 2 | 0.087 |
| Alanine_Aspartate_And_Glutamate_Metabolism            | 32 | 5 | 3 | 0.085 |
| Valine_Leucine_And_Isoleucine_Degradation             | 44 | 3 | 3 | 0.075 |
| Phototransduction                                     | 29 | 2 | 3 | 0.073 |
| Glutathione_Metabolism                                | 50 | 3 | 3 | 0.067 |
| Pyruvate_Metabolism                                   | 41 | 3 | 3 | 0.062 |
| Propanoate_Metabolism                                 | 32 | 2 | 2 | 0.059 |
| Staphylococcus_Aureus_Infection                       | 55 | 2 | 2 | 0.047 |
| RNA_Polymerase                                        | 29 | 2 | 2 | 0.04  |
| Glycosylphosphatidylinositol(Gpi)-Anchor_Biosynthesis | 25 | 1 | 2 | 0.037 |
| Asthma                                                | 30 | 2 | 2 | 0.036 |
| Butanoate_Metabolism                                  | 30 | 1 | 1 | 0.032 |
| Glycine_Serine_And_Threonine_Metabolism               | 32 | 2 | 1 | 0.029 |
| Drug_Metabolism_Other_Enzymes                         | 52 | 2 | 1 | 0.026 |
| Primary_Immunodeficiency                              | 35 | 1 | 1 | 0.025 |
| Aminoacyl-Trna_Biosynthesis                           | 63 | 1 | 1 | 0.019 |
| Steroid_Hormone_Biosynthesis                          | 56 | 1 | 1 | 0.019 |
| Arachidonic_Acid_Metabolism                           | 57 | 1 | 1 | 0.018 |

b) MiRSystem. Infraexpressed miRNAs. KEGG Pathway ranking summary report.

| KEGG Pathways                               | Total_genes_of_the_term | Union_target_s_in_the_term | Mirs_in_the_term | Score |
|---------------------------------------------|-------------------------|----------------------------|------------------|-------|
| Axon_guidance                               | 129                     | 39                         | 8                | 3.215 |
| Neurotrophin_signaling_pathway              | 127                     | 32                         | 9                | 2.002 |
| Ubiquitin_mediated_proteolysis              | 135                     | 29                         | 8                | 1.972 |
| TGF-beta_signaling_pathway                  | 84                      | 27                         | 7                | 1.956 |
| MAPK_signaling_pathway                      | 272                     | 54                         | 9                | 1.946 |
| Pathways_in_cancer                          | 325                     | 62                         | 9                | 1.89  |
| Endocytosis                                 | 201                     | 43                         | 8                | 1.758 |
| Protein_processing_in_endoplasmic_reticulum | 166                     | 30                         | 9                | 1.691 |
| Pancreatic_cancer                           | 70                      | 21                         | 8                | 1.647 |
| Cytokine-cytokine_receptor_interaction      | 275                     | 36                         | 7                | 1.597 |
| Amyotrophic_lateral_sclerosis_(als)         | 54                      | 19                         | 7                | 1.587 |
| Chronic_myeloid_leukemia                    | 73                      | 21                         | 9                | 1.581 |
| ErbB_signaling_pathway                      | 87                      | 25                         | 10               | 1.553 |
| Regulation_of_actin_cytoskeleton            | 213                     | 39                         | 9                | 1.525 |
| Jak-stat_signaling_pathway                  | 155                     | 22                         | 9                | 1.403 |
| Bacterial_invasion_of_epithelial_cells      | 70                      | 19                         | 8                | 1.388 |

|                                                        |     |    |    |       |
|--------------------------------------------------------|-----|----|----|-------|
| Prostate_cancer                                        | 89  | 22 | 8  | 1.354 |
| Glioma                                                 | 65  | 19 | 8  | 1.315 |
| Colorectal_cancer                                      | 62  | 16 | 7  | 1.225 |
| Melanoma                                               | 71  | 18 | 7  | 1.196 |
| Long-term_potentiation                                 | 70  | 19 | 6  | 1.194 |
| Insulin_signaling_pathway                              | 137 | 28 | 10 | 1.192 |
| Focal_adhesion                                         | 199 | 33 | 10 | 1.162 |
| Adherens_junction                                      | 73  | 19 | 8  | 1.144 |
| Shigellosis                                            | 61  | 15 | 7  | 1.118 |
| Olfactory_transduction                                 | 388 | 3  | 3  | 1.117 |
| T_cell_receptor_signaling_pathway                      | 108 | 21 | 7  | 1.105 |
| Non-small_cell_lung_cancer                             | 54  | 14 | 8  | 1.086 |
| Chemokine_signaling_pathway                            | 189 | 26 | 10 | 1.048 |
| Chagas_disease                                         | 104 | 20 | 7  | 1.045 |
| Renal_cell_carcinoma                                   | 70  | 18 | 8  | 1.041 |
| Small_cell_lung_cancer                                 | 84  | 14 | 7  | 1.03  |
| Toxoplasmosis                                          | 132 | 22 | 8  | 1.014 |
| Oocyte_meiosis                                         | 112 | 24 | 6  | 1.01  |
| Wnt_signaling_pathway                                  | 150 | 29 | 7  | 1.009 |
| Apoptosis                                              | 88  | 17 | 7  | 1.001 |
| p53_signaling_pathway                                  | 68  | 17 | 5  | 0.996 |
| Dilated_cardiomyopathy                                 | 90  | 19 | 8  | 0.989 |
| Calcium_signaling_pathway                              | 177 | 26 | 8  | 0.954 |
| Notch_signaling_pathway                                | 47  | 12 | 7  | 0.941 |
| Type_II_diabetes_mellitus                              | 47  | 11 | 8  | 0.921 |
| Progesterone-mediated_oocyte_maturation                | 86  | 17 | 7  | 0.914 |
| B_cell_receptor_signaling_pathway                      | 75  | 11 | 6  | 0.91  |
| Cell_cycle                                             | 124 | 21 | 7  | 0.909 |
| Arrhythmogenic_right_ventricular_cardiomyopathy_(arvc) | 74  | 12 | 7  | 0.882 |
| O-glycan_biosynthesis                                  | 30  | 8  | 6  | 0.853 |
| VEGF_signaling_pathway                                 | 76  | 12 | 7  | 0.849 |
| Phosphatidylinositol_signaling_system                  | 78  | 16 | 7  | 0.843 |
| Hypertrophic_cardiomyopathy_(hcm)                      | 87  | 16 | 8  | 0.827 |
| N-glycan_biosynthesis                                  | 49  | 10 | 6  | 0.813 |
| mTOR_signaling_pathway                                 | 52  | 13 | 7  | 0.808 |
| Aldosterone-regulated_sodium_reabsorption              | 42  | 11 | 7  | 0.789 |
| Natural_killer_cell_mediated_cytotoxicity              | 140 | 15 | 7  | 0.773 |
| Adipocytokine_signaling_pathway                        | 68  | 14 | 7  | 0.768 |
| Amoebiasis                                             | 105 | 14 | 8  | 0.752 |
| Fc_gamma_r-mediated_phagocytosis                       | 94  | 14 | 7  | 0.711 |
| Bladder_cancer                                         | 42  | 9  | 7  | 0.694 |
| Hepatitis_c                                            | 134 | 20 | 7  | 0.672 |
| Inositol_phosphate_metabolism                          | 57  | 11 | 6  | 0.636 |
| Endometrial_cancer                                     | 52  | 9  | 8  | 0.632 |
| Melanogenesis                                          | 101 | 17 | 5  | 0.621 |
| Rig-i-like_receptor_signaling_pathway                  | 71  | 10 | 7  | 0.616 |
| Spliceosome                                            | 127 | 11 | 7  | 0.592 |
| Gap_junction                                           | 90  | 14 | 4  | 0.591 |
| Vasopressin-regulated_water_reabsorption               | 44  | 8  | 7  | 0.573 |

|                                                                |     |    |   |       |
|----------------------------------------------------------------|-----|----|---|-------|
| Glycosphingolipid_biosynthesis_lacto_and_neolacto_s<br>eries   | 26  | 5  | 5 | 0.564 |
| Neuroactive_ligand-receptor_interaction                        | 318 | 22 | 7 | 0.559 |
| Viral_myocarditis                                              | 70  | 9  | 5 | 0.551 |
| GNRH_signaling_pathway                                         | 101 | 13 | 6 | 0.544 |
| Huntington's_disease                                           | 183 | 21 | 6 | 0.543 |
| Toll-like_receptor_signaling_pathway                           | 102 | 9  | 7 | 0.54  |
| Vascular_smooth_muscle_contraction                             | 126 | 14 | 7 | 0.533 |
| Hedgehog_signaling_pathway                                     | 56  | 11 | 5 | 0.529 |
| Prion_diseases                                                 | 36  | 7  | 5 | 0.529 |
| Leukocyte_transendothelial_migration                           | 116 | 11 | 7 | 0.514 |
| Acute_myeloid_leukemia                                         | 57  | 8  | 7 | 0.5   |
| RNA_degradation                                                | 57  | 8  | 6 | 0.499 |
| RNA_transport                                                  | 144 | 12 | 6 | 0.497 |
| Fc_epsilon_RI_signaling_pathway                                | 79  | 11 | 7 | 0.495 |
| Pancreatic_secretion                                           | 103 | 12 | 6 | 0.492 |
| Tight_junction                                                 | 132 | 15 | 6 | 0.46  |
| Basal_cell_carcinoma                                           | 55  | 9  | 5 | 0.452 |
| ECM-receptor_interaction                                       | 84  | 8  | 5 | 0.448 |
| Long-term_depression                                           | 70  | 11 | 4 | 0.442 |
| Alzheimer's_disease                                            | 168 | 17 | 7 | 0.44  |
| Maturity_onset_diabetes_of_the_young                           | 25  | 4  | 3 | 0.418 |
| Salivary_secretion                                             | 89  | 9  | 4 | 0.416 |
| ABC_transporters                                               | 44  | 5  | 5 | 0.414 |
| Cell_adhesion_molecules_(cams)                                 | 133 | 12 | 5 | 0.405 |
| Lysosome                                                       | 121 | 11 | 5 | 0.404 |
| Phagosome                                                      | 154 | 14 | 6 | 0.403 |
| Nod-like_receptor_signaling_pathway                            | 62  | 7  | 7 | 0.394 |
| Type_I_diabetes_mellitus                                       | 43  | 5  | 5 | 0.377 |
| Purine_metabolism                                              | 161 | 13 | 5 | 0.373 |
| Epithelial_cell_signaling_in_helicobacter_pylori_infectio<br>n | 68  | 7  | 6 | 0.358 |
| Basal_transcription_factors                                    | 35  | 4  | 5 | 0.342 |
| Starch_and_sucrose_metabolism                                  | 53  | 7  | 4 | 0.341 |
| Galactose_metabolism                                           | 26  | 3  | 5 | 0.336 |
| Gastric_acid_secretion                                         | 74  | 8  | 4 | 0.335 |
| Cardiac_muscle_contraction                                     | 77  | 6  | 6 | 0.328 |
| Leishmaniasis                                                  | 72  | 7  | 6 | 0.328 |
| Lysine_degradation                                             | 44  | 6  | 4 | 0.325 |
| Thyroid_cancer                                                 | 29  | 5  | 4 | 0.317 |
| Allograft_rejection                                            | 37  | 4  | 3 | 0.312 |
| Hematopoietic_cell_lineage                                     | 88  | 9  | 5 | 0.312 |
| Malaria                                                        | 51  | 5  | 5 | 0.31  |
| Parkinson's_disease                                            | 130 | 7  | 5 | 0.306 |
| Antigen_processing_and_presentation                            | 76  | 8  | 5 | 0.304 |
| Carbohydrate_digestion_and_absorption                          | 43  | 3  | 5 | 0.274 |
| Pyrimidine_metabolism                                          | 99  | 4  | 4 | 0.274 |
| Retinol_metabolism                                             | 65  | 5  | 2 | 0.271 |
| Peroxisome                                                     | 79  | 5  | 5 | 0.27  |
| Cysteine_and_methionine_metabolism                             | 36  | 5  | 5 | 0.254 |

|                                                       |     |   |   |       |
|-------------------------------------------------------|-----|---|---|-------|
| Graft-versus-host_disease                             | 41  | 4 | 4 | 0.237 |
| Regulation_of_autophagy                               | 34  | 5 | 4 | 0.237 |
| PPAR_signaling_pathway                                | 70  | 5 | 4 | 0.235 |
| Protein_digestion_and_absorption                      | 80  | 4 | 4 | 0.235 |
| Glycerophospholipid_metabolism                        | 79  | 6 | 4 | 0.226 |
| Nucleotide_excision_repair                            | 44  | 3 | 4 | 0.222 |
| Pentose_phosphate_pathway                             | 26  | 2 | 4 | 0.219 |
| Glycosaminoglycan_biosynthesis_heparan_sulfate        | 26  | 3 | 3 | 0.21  |
| Glycolysis_gluconeogenesis                            | 65  | 2 | 4 | 0.208 |
| Amino_sugar_and_nucleotide_sugar_metabolism           | 47  | 4 | 3 | 0.194 |
| Ascorbate_and_aldarate_metabolism                     | 26  | 3 | 1 | 0.19  |
| Snare_interactions_in_vesicular_transport             | 36  | 4 | 3 | 0.187 |
| Drug_metabolism_other_enzymes                         | 52  | 5 | 2 | 0.179 |
| Pathogenic_escherichia_coli_infection                 | 56  | 4 | 3 | 0.179 |
| Glutathione_metabolism                                | 50  | 4 | 3 | 0.177 |
| Steroid_hormone_biosynthesis                          | 56  | 4 | 1 | 0.175 |
| Pentose_and_glucuronate_interconversions              | 31  | 3 | 1 | 0.171 |
| Selenoamino_acid_metabolism                           | 26  | 3 | 4 | 0.169 |
| Fructose_and_mannose_metabolism                       | 34  | 2 | 3 | 0.165 |
| Sphingolipid_metabolism                               | 40  | 3 | 4 | 0.163 |
| Complement_and_coagulation_cascades                   | 69  | 2 | 3 | 0.16  |
| Arginine_and_proline_metabolism                       | 54  | 3 | 3 | 0.151 |
| Systemic_lupus_erythematosus                          | 136 | 4 | 2 | 0.151 |
| Metabolism_of_xenobiotics_by_cytochrome_p450          | 71  | 4 | 1 | 0.147 |
| Glycerolipid_metabolism                               | 49  | 2 | 3 | 0.144 |
| Porphyrin_and_chlorophyll_metabolism                  | 43  | 3 | 1 | 0.139 |
| Intestinal_immune_network_for_iga_production          | 48  | 3 | 3 | 0.127 |
| Glycine_serine_and_threonine_metabolism               | 32  | 2 | 2 | 0.125 |
| Alanine_aspartate_and_glutamate_metabolism            | 32  | 2 | 3 | 0.123 |
| Glycosylphosphatidylinositol(gpi)-anchor_biosynthesis | 25  | 1 | 3 | 0.12  |
| Oxidative_phosphorylation                             | 132 | 4 | 2 | 0.115 |
| Proteasome                                            | 44  | 2 | 2 | 0.107 |
| Homologous_recombination                              | 28  | 2 | 2 | 0.102 |
| Autoimmune_thyroid_disease                            | 52  | 2 | 1 | 0.1   |
| Drug_metabolism_cytochrome_p450                       | 73  | 3 | 1 | 0.095 |
| <i>Vibrio_cholerae</i> _infection                     | 54  | 3 | 1 | 0.087 |
| Collecting_duct_acid_secretion                        | 27  | 2 | 1 | 0.084 |
| Ether_lipid_metabolism                                | 35  | 1 | 2 | 0.083 |
| Pyruvate_metabolism                                   | 41  | 1 | 2 | 0.083 |
| Taste_transduction                                    | 52  | 2 | 2 | 0.08  |
| Base_excision_repair                                  | 33  | 1 | 2 | 0.078 |
| Citrate_cycle_(tca_cycle)                             | 31  | 1 | 2 | 0.078 |
| Fatty_acid_metabolism                                 | 43  | 2 | 1 | 0.063 |
| Primary_immunodeficiency                              | 35  | 1 | 1 | 0.044 |
| Tryptophan_metabolism                                 | 42  | 1 | 1 | 0.041 |
| Tyrosine_metabolism                                   | 41  | 1 | 1 | 0.041 |
| Asthma                                                | 30  | 1 | 1 | 0.04  |
| Phototransduction                                     | 29  | 1 | 1 | 0.04  |
| Arachidonic_acid_metabolism                           | 57  | 1 | 1 | 0.039 |
| DNA_replication                                       | 36  | 1 | 1 | 0.039 |

|                                        |    |   |   |       |
|----------------------------------------|----|---|---|-------|
| <i>Staphylococcus aureus</i> infection | 55 | 1 | 1 | 0.039 |
|----------------------------------------|----|---|---|-------|

### III: miRNAs and predicted target genes in pi3k / Akt and fatty acid metabolism in KEGG and Reactome.

#### MiRSystem v.2016

REACTOME. PI3K-AKT ACTIVATION. 19 miRNAs TARGET 19 GENES FROM 37 TOTAL GENES IN THE PATHWAY. SCORE 1.371

| Target Gene | Gene Description | Observed miRNA |
|-------------|------------------|----------------|
|-------------|------------------|----------------|

|               |                                                                         |                                                               |
|---------------|-------------------------------------------------------------------------|---------------------------------------------------------------|
| <i>PTEN</i>   | phosphatase and tensin homolog                                          | 130b-3p, 142-5p, 148a-3p, 21-5p, 23a-3p, 26b-5p, 320a, 486-5p |
| <i>IRS1</i>   | insulin receptor substrate 1                                            | 126-3p, 142-5p, 148a-3p, 15b-5p, 223-3p, 30d-5p               |
| <i>RICTOR</i> | RPTOR independent companion of MTOR, complex 2                          | 142-5p, 148a-3p, 15b-5p, 192-5p, 342-3p, 636                  |
| <i>CHUK</i>   | conserved helix-loop-helix ubiquitous kinase                            | 130b-3p, 148a-3p, 15b-5p, 223-3p, 23a-3p                      |
| <i>AKT3</i>   | v-akt murine thymoma viral oncogene homolog 3                           | 122-5p, 15b-5p, 320a, 34a-5p                                  |
| <i>CDKN1B</i> | cyclin-dependent kinase inhibitor 1B (p27, Kip1)                        | 148a-3p, 222-3p, 24-3p, 34a-5p                                |
| <i>FOXO1</i>  | forkhead box O1                                                         | 15b-5p, 223-3p, 320a, 486-5p                                  |
| <i>FOXO3</i>  | forkhead box O3                                                         | 122-5p, 223-3p, 23a-3p, 30d-5p                                |
| <i>IRS2</i>   | insulin receptor substrate 2                                            | 142-5p, 15b-5p, 23a-3p, 30d-5p                                |
| <i>PIK3R1</i> | phosphoinositide-3-kinase, regulatory subunit 1 (alpha)                 | 15b-5p, 21-5p, 222-3p, 486-5p                                 |
| <i>CREB1</i>  | cAMP responsive element binding protein 1                               | 122-5p, 223-3p, 30d-5p                                        |
| <i>CDKN1A</i> | cyclin-dependent kinase inhibitor 1A (p21, Cip1)                        | 130b-3p, 21-5p                                                |
| <i>FOXO4</i>  | forkhead box O4                                                         | 23a-3p, 24-3p                                                 |
| <i>PDPK1</i>  | 3-phosphoinositide dependent protein kinase-1                           | 223-3p, 23a-3p                                                |
| <i>PIK3R2</i> | phosphoinositide-3-kinase, regulatory subunit 2 (beta)                  | 126-3p, 30d-5p                                                |
| <i>GSK3B</i>  | glycogen synthase kinase 3 beta                                         | 26b-5p                                                        |
| <i>PIK3CA</i> | phosphatidylinositol-4,5-bisphosphate 3-kinase, catalytic subunit alpha | 148a-3p                                                       |
| <i>RHOA</i>   | ras homolog family member A                                             | 142-5p                                                        |
| <i>TRIB3</i>  | tribbles pseudokinase 3                                                 | 24-3p                                                         |

KEGG:INOSITOL\_PHOSPHATE\_METABOLISM. 18 miRNAs target 25 genes of 57 total in the pathway. Score 0.893

| Target Gene | Gene Description | Observed miRNA |
|-------------|------------------|----------------|
|-------------|------------------|----------------|

|                |                                                                          |                                                               |
|----------------|--------------------------------------------------------------------------|---------------------------------------------------------------|
|                |                                                                          |                                                               |
| <i>PTEN</i>    | phosphatase and tensin homolog                                           | 130b-3p, 142-5p, 148a-3p, 21-5p, 23a-3p, 26b-5p, 320a, 486-5p |
| <i>PLCB1</i>   | phospholipase C, beta 1 (phosphoinositide-specific)                      | 122-5p, 130b-3p, 148a-3p, 21-5p, 26b-5p, 34a-5p, 636          |
| <i>SYNJ1</i>   | synaptojanin 1                                                           | 142-5p, 146a-5p, 148a-3p, 15b-5p, 23a-3p, 34a-5p              |
| <i>PIP5K3</i>  | Phosphatidylinositol 4-phosphate 5-kinase 3                              | 130b-3p, 15b-5p, 21-5p, 23a-3p, 26b-5p                        |
| <i>INPP5B</i>  | inositol polyphosphate-5-phosphatase, 75kDa                              | 223-3p, 24-3p, 26b-5p                                         |
| <i>ITPK1</i>   | inositol-tetrakisphosphate 1-kinase                                      | 130b-3p, 148a-3p, 30d-5p                                      |
| <i>OCRL</i>    | oculocerebrorenal syndrome of Lowe                                       | 122-5p, 130b-3p, 15b-5p                                       |
| <i>PIP4K2B</i> | phosphatidylinositol-5-phosphate 4-kinase, type II, beta                 | 146a-5p, 23a-3p, 30d-5p                                       |
| <i>PIP5K1B</i> | phosphatidylinositol-4-phosphate 5-kinase, type I, beta                  | 142-5p, 146a-5p, 30d-5p                                       |
| <i>INPP5A</i>  | inositol polyphosphate-5-phosphatase, 40kDa                              | 197-3p, 23a-3p                                                |
| <i>PI4KB</i>   | phosphatidylinositol 4-kinase, catalytic, beta                           | 15b-5p, 34a-5p                                                |
| <i>PIP5K1A</i> | phosphatidylinositol-4-phosphate 5-kinase, type I, alpha                 | 23a-3p, 34a-5p                                                |
| <i>PLCB4</i>   | phospholipase C, beta 4                                                  | 23a-3p, 636                                                   |
| <i>PLCG1</i>   | phospholipase C, gamma 1                                                 | 30d-5p, 34a-5p                                                |
| <i>INPP5J</i>  | inositol polyphosphate-5-phosphatase J                                   | 15b-5p                                                        |
| <i>IPPK</i>    | inositol 1,3,4,5,6-pentakisphosphate 2-kinase                            | 23a-3p                                                        |
| <i>ITPKB</i>   | inositol-trisphosphate 3-kinase B                                        | 130b-3p                                                       |
| <i>PI4KA</i>   | phosphatidylinositol 4-kinase, catalytic, alpha                          | 148a-3p                                                       |
| <i>PIK3C2B</i> | phosphatidylinositol-4-phosphate 3-kinase, catalytic subunit type 2 beta | 30d-5p                                                        |
| <i>PIK3CA</i>  | phosphatidylinositol-4,5-bisphosphate 3-kinase, catalytic subunit alpha  | 148a-3p                                                       |
| <i>PIK3CD</i>  | phosphatidylinositol-4,5-bisphosphate 3-kinase, catalytic subunit delta  | 30d-5p                                                        |
| <i>PIK3CG</i>  | phosphatidylinositol-4,5-bisphosphate 3-kinase, catalytic subunit gamma  | 122-5p                                                        |
| <i>PIP4K2A</i> | phosphatidylinositol-5-phosphate 4-kinase, type II, alpha                | 30d-5p                                                        |
| <i>PIP4K2C</i> | phosphatidylinositol-5-phosphate 4-kinase, type II, gamma                | 142-5p                                                        |
| <i>PLCD1</i>   | phospholipase C, delta 1                                                 | 191-5p                                                        |

KEGG Fatty acid metabolism. 8 miRNAs target 8 genes from 43 genes total in the pathway. Score 0.229

| Target Gene | Gene Description | Observed miRNA |
|-------------|------------------|----------------|
|-------------|------------------|----------------|

|               |                                                |                                      |
|---------------|------------------------------------------------|--------------------------------------|
|               |                                                |                                      |
| <i>ACSL1</i>  | acyl-CoA synthetase long-chain family member 1 | 130b-3p, 15b-5p, 26b-5p, 34a-5p, 636 |
| <i>ACSL3</i>  | acyl-CoA synthetase long-chain family member 3 | 15b-5p, 223-3p, 26b-5p               |
| <i>ACSL4</i>  | acyl-CoA synthetase long-chain family member 4 | 130b-3p, 15b-5p, 34a-5p              |
| <i>ACADSB</i> | acyl-CoA dehydrogenase, short/branched chain   | 26b-5p                               |
| <i>ACOX1</i>  | acyl-CoA oxidase 1, palmitoyl                  | 15b-5p                               |
| <i>ACSL5</i>  | acyl-CoA synthetase long-chain family member 5 | 15b-5p                               |

|              |                                                    |        |
|--------------|----------------------------------------------------|--------|
| <i>ACSL6</i> | acyl-CoA synthetase long-chain family member 6     | 24-3p  |
| <i>ADH4</i>  | alcohol dehydrogenase 4 (class II), pi polypeptide | 23a-3p |

INFRAEXPRESSED>REACTOME. PI3K-AKT ACTIVATION. 9 miRNAs TARGET 14 GENES FROM 37 TOTAL GENES IN THE PATHWAY. SCORE 0.91

| Target Gene | Gene Description | Observed miRNA |
|-------------|------------------|----------------|
|-------------|------------------|----------------|

|               |                                                          |                       |
|---------------|----------------------------------------------------------|-----------------------|
|               |                                                          |                       |
| <i>PIK3R1</i> | phosphoinositide-3-kinase, regulatory subunit 1 (alpha)  | 21-5p, 324-3p, 590-5p |
| <i>CDKN1A</i> | cyclin-dependent kinase inhibitor 1A (p21, Cip1)         | 130b-3p, 21-5p        |
| <i>CREB1</i>  | cAMP responsive element binding protein 1                | 30b-5p, 30c-5p        |
| <i>FOXO3</i>  | forkhead box O3                                          | 30b-5p, 30c-5p        |
| <i>IRS1</i>   | insulin receptor substrate 1                             | 30b-5p, 30c-5p        |
| <i>IRS2</i>   | insulin receptor substrate 2                             | 30b-5p, 30c-5p        |
| <i>PIK3R2</i> | phosphoinositide-3-kinase, regulatory subunit 2 (beta)   | 30b-5p, 30c-5p        |
| <i>PTEN</i>   | phosphatase and tensin homolog                           | 130b-3p, 21-5p        |
| <i>AKT3</i>   | v-akt murine thymoma viral oncogene homolog 3            | 151a-3p               |
| <i>CHUK</i>   | conserved helix-loop-helix ubiquitous kinase             | 130b-3p               |
| <i>FOXO1</i>  | forkhead box O1                                          | 590-5p                |
| <i>GSK3B</i>  | glycogen synthase kinase 3 beta                          | 199a-5p               |
| <i>PHLPP</i>  | pleckstrin homology domain leucine-rich repeat protein p | 331-3p                |
| <i>RICTOR</i> | RPTOR independent companion of MTOR, complex 2           | 324-3p                |

INFRAEXPRESSED REACTOME:FATTY\_ACID\_TRIACYLGLYCEROL\_AND\_KETONE\_BODY\_METABOLISM. 9 mir regulates 22 genes from 112 total genes in the pathway.

| Target Gene | Gene Description | Observed miRNA |
|-------------|------------------|----------------|
|-------------|------------------|----------------|

|                |                                                       |                         |
|----------------|-------------------------------------------------------|-------------------------|
|                |                                                       |                         |
| <i>CHD9</i>    | chromodomain helicase DNA binding protein 9           | 130b-3p, 30b-5p, 30c-5p |
| <i>GRHL1</i>   | grainyhead-like 1 (Drosophila)                        | 125b-5p, 30b-5p, 30c-5p |
| <i>NCOR2</i>   | nuclear receptor corepressor 2                        | 125b-5p, 30b-5p, 30c-5p |
| <i>TBL1XR1</i> | transducin (beta)-like 1 X-linked receptor 1          | 130b-3p, 21-5p, 590-5p  |
| <i>ABCA1</i>   | ATP-binding cassette, sub-family A (ABC1), member 1   | 130b-3p, 324-3p         |
| <i>ELOVL5</i>  | ELOVL fatty acid elongase 5                           | 30b-5p, 30c-5p          |
| <i>ME1</i>     | malic enzyme 1, NADP(+)-dependent, cytosolic          | 30b-5p, 30c-5p          |
| <i>NCOA2</i>   | nuclear receptor coactivator 2                        | 151a-3p, 199a-5p        |
| <i>PPARA</i>   | peroxisome proliferator-activated receptor alpha      | 21-5p, 590-5p           |
| <i>RGL1</i>    | ral guanine nucleotide dissociation stimulator-like 1 | 30b-5p, 30c-5p          |
| <i>TBL1X</i>   | transducin (beta)-like 1X-linked                      | 30b-5p, 30c-5p          |
| <i>ACSL1</i>   | acyl-CoA synthetase long-chain family member 1        | 130b-3p                 |
| <i>ACSL4</i>   | acyl-CoA synthetase long-chain family member 4        | 130b-3p                 |
| <i>CTGF</i>    | connective tissue growth factor                       | 199a-5p                 |
| <i>CYP1A1</i>  | cytochrome P450, family 1, subfamily A, polypeptide 1 | 125b-5p                 |
| <i>ELOVL1</i>  | ELOVL fatty acid elongase 1                           | 125b-5p                 |
| <i>ELOVL6</i>  | ELOVL fatty acid elongase 6                           | 125b-5p                 |
| <i>GP1D</i>    | glycerol-3-phosphate dehydrogenase 1 (soluble)        | 199a-5p                 |
| <i>LPIN2</i>   | lipin 2                                               | 21-5p                   |



|               |                                                              |         |
|---------------|--------------------------------------------------------------|---------|
| <i>NCOA1</i>  | nuclear receptor coactivator 1                               | 130b-3p |
| <i>PRKAA2</i> | protein kinase, AMP-activated, alpha 2 catalytic subunit     | 130b-3p |
| <i>PRKAG2</i> | protein kinase, AMP-activated, gamma 2 non-catalytic subunit | 199a-5p |

KEGG. Fatty acid metabolism: mir-130b-3p targets ACSL1 and ACSL4, acyl-CoA synthetase long-chain family member 1 and 4, 2/43 genes of the pathway.
