# Supplementary material
Source: publisher figshare collection journal article supplement (https://tandf.figshare.com/articles/dataset/_/9879284)
Supplement: Supplementary file 4 [file 1]

## Supplemental Material 2a. Summary of included studies.

| Study                             | Cohort                                                                                                                                                                                                                                                                                                                                                                                                                                                                                                                                                                                                                                                                                                                                   | Overexpressed miRNAs<br>Obesity vs Lean                                                                                                                                                                                                                                                                                                                                                                                                                                                                                                                                                                                                                                             | Subexpressed miRNAs<br>Obesity vs Lean                                                                                                                                                                                                                                                                                                            | miR profiling methods                                                                                                                                  | Comments                                                                                                                                                                                                                                   |
|-----------------------------------|------------------------------------------------------------------------------------------------------------------------------------------------------------------------------------------------------------------------------------------------------------------------------------------------------------------------------------------------------------------------------------------------------------------------------------------------------------------------------------------------------------------------------------------------------------------------------------------------------------------------------------------------------------------------------------------------------------------------------------------|-------------------------------------------------------------------------------------------------------------------------------------------------------------------------------------------------------------------------------------------------------------------------------------------------------------------------------------------------------------------------------------------------------------------------------------------------------------------------------------------------------------------------------------------------------------------------------------------------------------------------------------------------------------------------------------|---------------------------------------------------------------------------------------------------------------------------------------------------------------------------------------------------------------------------------------------------------------------------------------------------------------------------------------------------|--------------------------------------------------------------------------------------------------------------------------------------------------------|--------------------------------------------------------------------------------------------------------------------------------------------------------------------------------------------------------------------------------------------|
| <b>Murri<br/>2018<br/>(Spain)</b> | Serum samples. Adults. 12 women with PCOS (lean n=6, 27 sd 4 yr, BMI 22 sd 2; obese n=6, 27 sd 2 yr, BMI 39 sd 9), 12 control women (lean n= 5, 28 SD 3 yr, BMI 22 SD 2: obese n=6, 31 sd 6 yr, BMI 37 sd 3) and 12 men (lean n=6, 29 sd 3 yr, BMI 24 sd 1: obese n=6, 33 sd 6 yr, BMI 42 sd 8).                                                                                                                                                                                                                                                                                                                                                                                                                                         | let-7b-3p (2.60), let-7g-3p (2.28), miR-16-1-3p (1.68), miR-23a-3p (1.39), miR-24-3p (1.29), miR-29c-3p (3.41), miR-30e-5p (1.33), miR-122-3p (2.55), miR-140-5p (1.66), miR-142-5p (1.50), miR-143-3p (1.67), miR-148a-3p (1.94), miR-181c-3p (4.92), miR-192-5p (1.68), miR-193a-5p (2.10), miR-197-3p (1.95), miR-203a (2.31), miR-223-3p (1.96), miR-223-5p (2.17), miR-302c-5p (2.96), miR-338-3p (1.87), miR-345-5p (1.65), miR-361-5p (1.47), miR-365a-3p (3.13), miR-378a-3p (1.47), miR-378a-5p (3.75), miR-424-5p (1.66), miR-425-3p (1.23), miR-425-5p (1.33), miR-582-5p (2.96), miR-651 (3.77), miR-671-5p (1.95), miR-877-5p (1.47), miR-1537 (2.77), miR-1539 (2.12) | let-7a-5p (0.73), let-7c (0.77), let-7d-5p (0.65), let-7f-5p (0.69), miR-18a-5p (0.82), miR-30b-5p (0.77), miR-30c-5p (0.79), miR-98-5p (0.62), miR-103a-3p (0.71), miR-107 (0.78), miR-151a-3p (0.74), miR-151a-5p (0.69), miR-181a-2-3p (0.42), miR-199a-5p (0.61), miR-331-3p (0.67), miR-379-3p (0.50), miR-431-5p (0.41), miR-744-5p (0.70). | miRCURY LNA™ Universal RT microRNA PCR, 4x Human panel I+II (Exiqon, Denmark) (752). miRNA-specific real-time PCR (RT-PCR) using a LightCycler® 480 II | Results in fold-change Normalized to 5 reference miRNAs: miR-191-5p, miR-30c-5p, miR-423-3p, miR-423-5p and miR-93-5p.                                                                                                                     |
| <b>Cui<br/>2018<br/>(China)</b>   | Serum samples. discovery study: 9 children with obesity and 9 controls with normal weight were pooled into 3 pools, for miRNA profiling experiments cross-sectional validation study: the miRNAs of interest were validated in 352 individuals (100 children with obesity (61 sd 10.4 months, 51-5% girls, BMI 20.3 sd 2.20), 106 children with overweight (59.6 sd 11 months, 52.8% girls, BMI 17.4 sd 0.60) and 146 controls (60.4 sd 11.1 months, 49.6% girls, BMI 15.1 sd 1.06) 3) longitudinal validation study: the candidate miRNAs were estimated in newly diagnosed patients with T2D (n = 101, 57.5 sd 12.2 yr; BMI 26.8 sd 4.19) and controls with normal glucose tolerance (NGT) (n = 82, 49.3 sd 7.73 yr, BMI 24.3 sd 3.22) | miR-146a-5p (+1.01)<br>miR-130b-3p (+1.07)<br>miR-222-3p (+1.15)<br>miR-486-5p (+1.21)<br>miR-148a-3p (+1.28)<br>miR-21-5p (+1.55)<br>miR-375 (+1.73)<br>miR-146b-5p (+1.94)<br>miR-99b-5p (+1.96)<br>miR-30a-3p (+2.17)<br>miR-27a-3p (+2.58)<br>miR-30d-5p (+2.67)<br>let-7d-5p (+2.85)<br>miR-26b-5p (+3.43)<br>miR-15b-5p (+8.79)<br>miR-19a-3p (+9.06)<br>miR-20a-5p (+9.64)                                                                                                                                                                                                                                                                                                   | miR-197-3p (-1.41)                                                                                                                                                                                                                                                                                                                                | microRNA sequencing platform (Illumina Inc). FASTX-Toolkit software. RT-qPCR: ViiA7 Real-Time PCR System (Applied Biosystems)                          | Normalized to cel-miR-39. 177 miRNAs were detected in pooled samples. 94 miRNAs exhibited a >2-fold difference between groups. Based on the fold change and expression abundance, they selected 18 miRNAs as candidates for further study. |
| <b>Ghorbani<br/>2017</b>          | Serum samples. 45 T2D (29 female, 47.6 sd 5.8 yr, BMI                                                                                                                                                                                                                                                                                                                                                                                                                                                                                                                                                                                                                                                                                    |                                                                                                                                                                                                                                                                                                                                                                                                                                                                                                                                                                                                                                                                                     | miR-21 (0.81)                                                                                                                                                                                                                                                                                                                                     | RT-qPCR: Rotogene Q (3)                                                                                                                                | Normalized to cel-mir-39 and miR-16 as internal                                                                                                                                                                                            |

|                             |                                                                                                                                                                                                                                                                                       |                                                                                                                                                                                                                                                                                                   |                                                      |                                                                                                                                                                            |                                                                                                      |
|-----------------------------|---------------------------------------------------------------------------------------------------------------------------------------------------------------------------------------------------------------------------------------------------------------------------------------|---------------------------------------------------------------------------------------------------------------------------------------------------------------------------------------------------------------------------------------------------------------------------------------------------|------------------------------------------------------|----------------------------------------------------------------------------------------------------------------------------------------------------------------------------|------------------------------------------------------------------------------------------------------|
| <b>(Iran)</b>               | 27.3 sd 3.9), 42 non-T2D (21 female, 56.5 sd 8.1 yr, BMI 28.2 sd 4.8)                                                                                                                                                                                                                 |                                                                                                                                                                                                                                                                                                   |                                                      |                                                                                                                                                                            | control.                                                                                             |
| <b>Thompson 2017 (USA)</b>  | Plasma samples. Children; 10 healthy controls (13.8 yr, 60% girls, BMI 20.11) vs 20 children with obesity (13.2 yr, 30% girls, BMI 34.7)                                                                                                                                              | 15b-5p(+3.42), 199a-5p (+17.18), 222-3p(+2.14), 223-3p(+6.72), 181b-5p (+3.29), 122-5p(+12.48), 23a-3p (+5.3), 27b-3p (+6.74), 21-5p (+4.89), 34a-5p (+5.09), 192-5p (+3.78), 29a-3p (+2.81), 214-5p (+2.73), 155-5p (+2.63), 191-5p (+7.21), 103a-5p (+3.38)                                     |                                                      | RT-qPCR: Exiqon Pick and Mix miRNA PCR panel (20)                                                                                                                          | Normalized to UniSp2. Reported data: fold change                                                     |
| <b>Wander 2017 (USA)</b>    | Plasma samples. Among participants in the Omega study. Pregnant woman; 36 GDM cases, 34.3 yr, 16.5 weeks GA, ppBMI 25.5, 80 normal controls, 32.9 yr, 15.1 weeks GA, ppBMI 21.7.                                                                                                      | GDM 155-5p (+2.11); 21-3p (+3.59); 146b-5p (+2.79); 223-3p(+1.89); 517-5p (+1.93); 29a-3p (+1.43) Obese + GDM 1210-3p (+1.53)                                                                                                                                                                     |                                                      | RT-qPCR: 10 selected miR: Custom targeted panel Exiqon LNA primers (10)                                                                                                    | Normalized to cel-miR-39; and endogenous miR-423-3p.                                                 |
| <b>Zhao 2017 (USA)</b>      | Plasma samples. 300 Mexican American women, mean 40 yr. Training set (arrays) n= 40, 47.5% with obesity at baseline, 72.5% at 5 yr of follow-up Testing set 1, n=160, 47.5% with obesity at baseline, 54.4% at 5 yr. Testing set 2: n=100, 57% with obesity at baseline, 63% at 5 yr. | Obesity at baseline (rho) 142(+0.374), 122(+0.405), 30a(+0.411), 519d (+0.313),                                                                                                                                                                                                                   | 125b(-0.316)                                         | Arrays: TaqMan Array Human Microarray Card Set v3.0 (384) RT-qPCR: Individual TaqMan miRNA Assays                                                                          | Normalized to cel-miR-39 y cel-miR-54. Reported data: Cox-regression coefficient                     |
| <b>Xiong 2017 (China)</b>   | Serum samples. Women from East China. 18 women with PCOS (25.8 yr, BMI 24) and 30 healthy women (25.5 yr, BMI 20)                                                                                                                                                                     | +23a (obese women with PCOS) +23b (obese women)                                                                                                                                                                                                                                                   |                                                      | RT-qPCR: miRcute miRNA qPCR detection kit (2)                                                                                                                              | Groups divided accordingly endometrial cycle. Normalized to U6.                                      |
| <b>Shah 2017 (USA)</b>      | Plasma samples. FHS Offspring Cohort, n=2317, 65.8 yr, 56% women, BMI 27.7. Validation youth cohort: n= 90 ob/ow, 15.5 yr, 60% women, BMI 33.8. Initial study RNAseq: n=40, 68.8 yr, BMI 28.2, 50% female, 50% with CVD                                                               | 122-5p(+0.046), 16-5p (+0.024), 191-5p(+0.037), 192-5p (+0.053), 194-5p (+0.033), 197-3p (+0.038), 19b-3p (+0.037), 24-3p (+0.032), 301b-3p (+0.029), 30d-5p (+0.033), 320a (+0.035), 342-3p (+0.045), 486-5p (+0.030), 574-3p (+0.035), 616-5p (+0.040), 664b-3p (+0.015); snoRNA-1210: (+0.016) | 320b (-0.016), 4446-3p (-0.033), piRNA-48383(-0.027) | Small-RNA sequencing: Ion Torrent Proton Sequencer High-throughput RT-PCR: miScript assay technologies, Fluidigm Biomark system (391 ex-RNA, 297 miR, 36 snoRNA, 58 piRNA) | 122 and 192 validated in youth cohort Reported data: B-estimates p/HOMA-IR.                          |
| <b>Willeit 2017 (Italy)</b> | Serum and plasma samples. Bruneck Study: n= 810 Caucasian patients, 50% female, 63 yr; BMI 26, free of preexisting disease at baseline. 136 developed metabolic syndrome, 57 T2D after 10 years:1995-2005)                                                                            | 122 (+1.6)                                                                                                                                                                                                                                                                                        |                                                      | RT-qPCR: TaqMan miRNA assays (1)                                                                                                                                           | Normalized to U6 and cel-miR-39. They measure miR-122 at baseline and after 5 years. 100% follow-up. |
| <b>Hubal</b>                | Plasma and serum samples. 6                                                                                                                                                                                                                                                           | 1227-3p (+2.23), 4691-5p (+1.98), 3926 (-1.52), 224-5p (-1.53), 4723-5p                                                                                                                                                                                                                           |                                                      | Affimetrix GeneChip                                                                                                                                                        | In circulating adipocyte-                                                                            |

|                                   |                                                                                                                                                                                                                                                                                                                                                                                                             |                                                                                                                                                                                                                                                                                                                                                                                                                                                                                                                                                                                                            |                                                                                                                        |                                                                      |                                                                                                                                                                                                                             |
|-----------------------------------|-------------------------------------------------------------------------------------------------------------------------------------------------------------------------------------------------------------------------------------------------------------------------------------------------------------------------------------------------------------------------------------------------------------|------------------------------------------------------------------------------------------------------------------------------------------------------------------------------------------------------------------------------------------------------------------------------------------------------------------------------------------------------------------------------------------------------------------------------------------------------------------------------------------------------------------------------------------------------------------------------------------------------------|------------------------------------------------------------------------------------------------------------------------|----------------------------------------------------------------------|-----------------------------------------------------------------------------------------------------------------------------------------------------------------------------------------------------------------------------|
| <b>2017<br/>(USA)</b>             | African-American women with obesity (38.5 yr, BMI 51.2)                                                                                                                                                                                                                                                                                                                                                     | 219a-5p (+1.8), 4728-3p (+1.64), 103-3p (+1.59), 3622a-3p (+1.54), 4749-3p (+1.53), <u>125b-3p</u> (+1.50)                                                                                                                                                                                                                                                                                                                                                                                                                                                                                                 | (-1.58), 16-5p (-1.59), 3690 (-1.73), 208a-3p (-1.82), 4716-3p (-1.87), 4525 (-1.91), 2355-5p (-1.93), 4782-5p (-2.29) | microRNA 4.0 arrays (2578)                                           | derived exosomes. 168miR differentially expressed after one year post-surgery (gastric bypass). They found 168 miR with differential expression, 56 human mature miR, and reported those associated with insulin signaling. |
| <b>Enquobahrie 2017<br/>(USA)</b> | Plasma samples. Among participants from two cohorts: Omega and POUCH studies: Omega study: n=20, 29.75 yr, 16.62GA, BMI <18 n=1, 18-25 n=12, >25 n=7. POUCH study: n=20, 26.01 yr, 22.40GA, BMI<18 n=1, 18-25 n=9, >25 n=10                                                                                                                                                                                 | Pregestational Ob/ow (+) 28-3p(0.115, 0.101), let-7d*(0.117, 0.081), 3137(0.125, 0.105), 584(0.120, 0.110), 28-5p(0.130, 0.118), 4286(0.096, 0.104), 376a(0.174, 0.141), 423-5p(0.082, 0.079), 425(0.138, 0.099), 199a-5p(0.185, 0.147), 652(0.133, 0.117), 151-3p(0.130, 0.115), 221(0.185, 0.124), 891a(0.116, 0.093), 103-2(0.080, 0.076), 361-5p(0.126, 0.112), 151-5p(0.164, 0.145), <u>130b</u> (0.119, 0.103), 146b-5p(0.161, 0.160), 377(0.153, 0.129), 128(0.129, 0.121), 139-5p(0.090, 0.070), 423-3p(0.116, 0.100), 487b(0.130, 0.114), 191(0.130, 0.130), 29c(0.112, 0.120), 26b(0.060, 0.165) |                                                                                                                        | Arrays: Microarray based epigenome wide miRNA profiling (319)        | Reported data: B-estimates from both cohorts (Omega and Pouch). All positively correlated.                                                                                                                                  |
| <b>Nunez-Lopez 2016<br/>(USA)</b> | Serum samples. From ORIGINS trial. Subjects Lean vs with obesity; health or with prediabetes or T2D; lean+healthy (n=10, 8 female, 32 yr, BMI 21.8); lean+prediabetes (n=10, 6 female, 42.5 yr, BMI 21.7); lean+T2D (n=2, 1 female, 41 yr, BMI 23.1); obesity+healthy (n=9, 7 female, 34 yr, BMI 35); obesity+prediabetes (n=11, 5 female, 42 yr, BMI 35.1); obesity+T2D (n=15, 5 female, 51 yr, BMI 36.5). | Obesity vs lean(logFC) 21 (+0.33), 24.1(+0.74), 27a (+0.6), 34a (+1.18), 126 (+0.32), 146a (+0.73), 148a (+0.87), 152 (+0.66), 223(+0.58)                                                                                                                                                                                                                                                                                                                                                                                                                                                                  | 25 (-0.44), 93 (-0.48), 150 (-0.67)                                                                                    | RT-qPCR: TaqMan Universal Master Mix and TaqMan microRNA Assay. (23) | A diabetes-related human miRNA panel was used. Normalized to cel-mir-39 and 3 endogenous miR: 191, 423-3p and 451. Reported data: differential abundant in circulation, logFC, median and interquartile rank.               |
| <b>August 2016<br/>(Spain)</b>    | Serum samples. Women. 62 with morbid obesity MO; 30 with moderate obesity ModO; 30 normal weight (41 yr, BMI 22.1). Both obesity groups divided according to liver disease. In -ModO: normal (n=9, 49.8 yr, BMI 35.4), SS (N=9, 49.06 yr, BMI 36.2, NASH n=12, 52.23 yr, BMI 35.1). In MO: normal (n=22,                                                                                                    | 33b* MO vs ModO 122 MO vs ModO                                                                                                                                                                                                                                                                                                                                                                                                                                                                                                                                                                             |                                                                                                                        | RT qPCR:miRNeasy Serum/Plasma kit (Qiagen) (3)                       | MO + NASH >122 than MO with SS Normalized to cel-mir-39 Reported data: arbitrary units                                                                                                                                      |

|                                     |                                                                                                                                                                                                                                                                                                                                                                  |                                                                                                                          |                                                                                                                                                                                                      |                                                                                                               |                                                                                                                                                                                                                                                                     |
|-------------------------------------|------------------------------------------------------------------------------------------------------------------------------------------------------------------------------------------------------------------------------------------------------------------------------------------------------------------------------------------------------------------|--------------------------------------------------------------------------------------------------------------------------|------------------------------------------------------------------------------------------------------------------------------------------------------------------------------------------------------|---------------------------------------------------------------------------------------------------------------|---------------------------------------------------------------------------------------------------------------------------------------------------------------------------------------------------------------------------------------------------------------------|
|                                     | 46.3 yr, BMI 48.5), SS (n=18, 47.2 yr, BMI 48.9) NASH n=22, 48.8 yr, BMI 47.2)                                                                                                                                                                                                                                                                                   |                                                                                                                          |                                                                                                                                                                                                      |                                                                                                               |                                                                                                                                                                                                                                                                     |
| <b>Iacomino 2016 (Italy)</b>        | Plasma samples. IDEFICS Cohort; 20 children selected from the Italian cohort of the "I.Family project": 2 groups: 1) normal weight girls, 5 boys, 10.5 yr, BMI 16.45), 2) ow/ob (4 girls, 6 boys, 10.7 yr, BMI 31.68)                                                                                                                                            | Arrays 26b-5p (+25.3723), 31-5p(+4.9499), 2355-5p(+6.5213) RT-qPCR 531-5p (+1.92), 2355-5p (+2.93)                       | 206 (-0.52) With differences in microarray but without RT-qPCR validation: 1231 (-8.7217), 361-3p (-4.8918), 136-5p (-4.8356), 320a (-9.9692), 206 (-6.0515)                                         | Arrays: Serum and Plasma 384HC miScript miRNA PCR Arrays (Qiagen) RTqPCR: SYBR Green PCR kit (Qiagen) (372)   | Normalized to cel-miR-39-3p, SNORD61, SNORD68, SNORD72, SNORD95 and SNORD96A Reported data: fold change expression                                                                                                                                                  |
| <b>Masotti 2017 (Italy)</b>         | Serum samples. 12 children with obesity selected from the cohort "Origin study" whose BMI switched from normal weight to ow/ob in the year prior to enrolment. 6 insulin-resistant (4.63 yr, BMI 20.87), 6 insulin-sensitive (4.35 yr, BMI 18.52). Age, sex and BMI matched.                                                                                     | 505-3p(+3.11), 122-5p(+2.82), 34a-5p(+2.41), 26b-5p(+1.63), 320a(+1.55), 146a-5p(+1.48), 148b-3p(+1.47), 342-3p(+1.46)   | 660-5p(-1.50), 19a-3p(-1.55), 95(-1.72), 205-5p(-2.60), 200c-3p(-2.78), 190a(-3.04)                                                                                                                  | Arrays: Serum/Plasma Focus microRNA PCR Panel (Exiqon) (179)                                                  | Comparison between obese children, with or without insulin resistance. With differences statistically significant in weight, height, ALT and HDL-cholesterol between groups. Reported data: mean fold change expression. Normalized: two artificial spike-in miRNAs |
| <b>Liu 2016 (China)</b>             | Serum samples. 25 control subjects (51.12 yr, BMI 21.94); 24 subjects with obesity, (46.96 yr, BMI 30.81). 50% women in both groups, sex and age matched.                                                                                                                                                                                                        |                                                                                                                          | -1934(-32.5%)                                                                                                                                                                                        | RT-qPCR: miScript SYBR Green PCR kit (1)                                                                      | Normalized to RNU6B. Reported data: Relative expression                                                                                                                                                                                                             |
| <b>Carreras-Badosa 2015 (Spain)</b> | Plasma samples. 70 pregnant Caucasian women, 24-32 sdg; 3 groups: 20 pregestational obesity (31 yr, BMI 1st to 3rd trim 29.4-32.3), 25 gestational obesity (30 yr, BMI 1st to 3rd trim 23-29.2), 25 normal pregnancies (30 yr, BMI 1st to 3rd trim 23-26.7). Arrays: 6 women were randomly selected, from each group. Validation RT-qPCR in the complete cohort. | GestOb vs control 30a-5p (+1.89), 130a(+1.63), 150(+1.75) Ob vs control 625(+1.82, +1.30) PregestOb vs GestOb 221(+1.78) | GestOb vs control 29c(-1.32), 99b (-1.43), 103(-1.64), 221(-1.65), 340(-3) PregestOb vs GestOb 130a(-1.76) Ob vs control 122(-2.07,-1.45), 324-3p(-1.75,-2.00), 375(-2.08, -1.56), 652(-1.19, -1.70) | TaqMan Low Density Arrays human mRNA Card Set version 3.0 RT-qPCR: Individual TaqMan miRNA Assays (723)       | Normalized to U6 snRNA and 3 miR endogenous. 18 miR deregulated in microarrays, 13 confirmed by RT-qPCR Reported data: relative expression                                                                                                                          |
| <b>Pek 2016 (China)</b>             | Whole blood samples. N=32 men, 4 groups n=8: 1) non-T2D, lean (42.3 yr, BMI 21.3), 2) non-T2D with, obesity (36.6 yr, BMI 33.3), 3 T2D-lean (50.5 yr, BMI 22.4), 4) T2D-obesity(38.0, BMI 37.0)                                                                                                                                                                  |                                                                                                                          | -125b, -181a, -210, -378 -100 (obese and diabetic vs control)                                                                                                                                        | Arrays: Agilent SurePrint G3 Human miRNA microarray v.16 RT-qPCR: LNA-qPCR individual primers (Exiqon) (1205) | 215 detected in microarrays; 31 significantly different between the 4 groups; 8 validated by RT-qPCR Reported Data: relative expression Normalized to SNORD48                                                                                                       |
| <b>Khalyfa 2016 (USA)</b>           | Plasma samples. 16 children with obesity/overweight , 8 with endothelial dysfunction,                                                                                                                                                                                                                                                                            | 365b-3p (+1.41, +1.52)                                                                                                   | 125a-5p (-1.33, -1.27), 342-3p (-1.41, -1.22)                                                                                                                                                        | Pathway specific for human CVD miRNA PCR Array Qiagen                                                         | Comparisons in obese/overweight children with or without endothelial                                                                                                                                                                                                |

|                              |                                                                                                                                                                                                                                                                                                                                                             |                                                                                                  |                                                                                                                                                                                                                                                                                                                                                                                                            |                                                                                                    |                                                                                                                                                                                                                                           |
|------------------------------|-------------------------------------------------------------------------------------------------------------------------------------------------------------------------------------------------------------------------------------------------------------------------------------------------------------------------------------------------------------|--------------------------------------------------------------------------------------------------|------------------------------------------------------------------------------------------------------------------------------------------------------------------------------------------------------------------------------------------------------------------------------------------------------------------------------------------------------------------------------------------------------------|----------------------------------------------------------------------------------------------------|-------------------------------------------------------------------------------------------------------------------------------------------------------------------------------------------------------------------------------------------|
|                              | 8 with normal endothelial function; (8.41 yr and 7.59 yr) Matched for age, sex, ethnicity and BMI (74% white, 60% male)                                                                                                                                                                                                                                     |                                                                                                  |                                                                                                                                                                                                                                                                                                                                                                                                            | RT-qPCR: SYBR Green Real-Time PCR (84)                                                             | function. No lean control. Normalized: cel-mir-39 and SNORD68                                                                                                                                                                             |
| <b>Can 2016 (Turkey)</b>     | Whole blood samples. Turkish children. 45 children with obesity (19 male, 26 female) and adolescents vs 41 controls (17 male, 24 females) (14.71 yr and 14.44 yr; BMI 41.31 and 18.94, respectively). Matched for age and sex.                                                                                                                              | 27(+1.61), 378(+3), 370(+3.37)                                                                   | 335-5p(-4.46), 143(-3.78), 758-3p(-2.75)                                                                                                                                                                                                                                                                                                                                                                   | RT-qPCR: miRCURY LNA Universal RT PCR kit (Exiqon) (7)                                             | Reported data: medians; analysis ROC.                                                                                                                                                                                                     |
| <b>Thomé 2015 (Brazil)</b>   | Plasma samples. 57 age and gender matched subjects: 40 patients with heart-failure (65% men, 20 with obesity: 54.9yr, BMI 37.3; 20 lean: 54.9 yr BMI 21.8). 17 healthy controls (52.1 yr, BMI 24.7, 71% men).                                                                                                                                               |                                                                                                  | -130b                                                                                                                                                                                                                                                                                                                                                                                                      | RT-qPCR: TagMan miR Expression Array Probes (4)                                                    | miR-423-5p elevated in heart failure vs control; 221 and 21 ns<br>Normalized: cel-miR-39<br>Reported data: fold change                                                                                                                    |
| <b>Wen 2015 (China)</b>      | Serum samples. Asian population. 41 normal-weight (50.5 yr, BMI 21.7); 40 Ob (51.6 yr, BMI 25.7); 40 Ob (50.4 yr, BMI 30.2). 50% women each group                                                                                                                                                                                                           |                                                                                                  | 223(ow -7.11, ob -1.65)                                                                                                                                                                                                                                                                                                                                                                                    | RT-qPCR: SYBR Premix DimerEraser kit (1)                                                           | Normalized: cel-miR-39<br>miR-223 increased after 3-months lifestyle intervention<br>Reported data: median and interquartile rank                                                                                                         |
| <b>Párrizas 2015 (Spain)</b> | Serum samples. 92 men, 29 control group (54.39 yr, BMI 29.11), 22 individuals with prediabetes IFG (53.62 yr, BMI 29.46), and 21 individuals with prediabetes IGT, 56.79 yr, BMI 28.98 and 20 newly diagnosed T2D, 55.68 yr, IMC 30.08<br>A second cohort (exercise intervention, n=18, both sexes, 12 control, 6 with prediabetes (3 with IGT, 3 with IFG) | +192, +193b<br>With differences in microarrays but without RT-qPCR validation:<br>+125a-5p, +150 | With differences in microarrays but without RT-qPCR validation:<br>-191, -15b, -128                                                                                                                                                                                                                                                                                                                        | Arrays: Exiqon panels (176)<br>RT-qPCR: Exiqon SYBRGreen primers                                   | Reported data in dCt value.<br>Normalized with endogenous miR (let-7b, let-7g and let-7i). All participants Ow/Ob. miR-192 and 193b overexpressed in prediabetes; 2 <sup>nd</sup> cohort: baseline expression post-exercise intervention. |
| <b>Wang 2015 (China)</b>     | Serum samples. In Chinese people. Arrays: 56 patients with obesity (24.31 yr, 50% women, BMI 39.03) and 56 control subjects (24.47 yr, 50% women, BMI 20.97)<br>RT-qPCR Validation:<br>107 lean control (23.97 yr, 53.3% women, BMI 20.79).<br>123 subjects with obesity (24.02 yr, 50% women, BMI 37.73)                                                   | 122(+3.22), 636(+6.19), 933(+4.26), 574-5p(+3.05)                                                | 140-3p(-0.33), 20b(-0.31), 19b(-0.29), 550a(-0.29), 361-5p(-0.29), 17(-0.28), 30a(-0.27), 654-5p(-0.27), 324-3p(-0.24), 148b(-0.21), 10a(-0.19), 151-3p(-0.18), 335(-0.18), 126*(-0.18), 142-5p(-0.17), 494(-0.17), 151-5p(-0.15), 223*(-0.13), 331-3p(-0.11), 144*(-0.10), 199a-5p (-0.049), 195(-0.04), 301-a(-0.04), 338-3p(-0.04), 590-5p(-0.03), 186(-0.03), 30c(-0.029), 30b(-0.020), 140-5p(-0.015) | Microarray: Agilent Human miRNA 8*60K v.16 (1205)<br>RT-qPCR miRCURY LNA Universal RT kit (Exiqon) | Reported data: quartile normalized fluorescence intensities.<br>Normalized with algorithm<br>Quantile<br>miR-122 was the only miR validated in RT-qPCR<br>4 initial pools, 28 patients each (for microarrays)                             |

|                                |                                                                                                                                                                                                                                                                                                                                                                                                                                                                                                                |                                                                                                                                                            |                                                                                                                                                                                                        |                                                                                                                                     |                                                                                                                                                                                                                                                                                                                                              |
|--------------------------------|----------------------------------------------------------------------------------------------------------------------------------------------------------------------------------------------------------------------------------------------------------------------------------------------------------------------------------------------------------------------------------------------------------------------------------------------------------------------------------------------------------------|------------------------------------------------------------------------------------------------------------------------------------------------------------|--------------------------------------------------------------------------------------------------------------------------------------------------------------------------------------------------------|-------------------------------------------------------------------------------------------------------------------------------------|----------------------------------------------------------------------------------------------------------------------------------------------------------------------------------------------------------------------------------------------------------------------------------------------------------------------------------------------|
| <b>Pescador 2013 (Spain)</b>   | Serum samples. 13 patients with T2D (46% women, 69.4 yr, BMI 24.86); 20 patients with obesity (85% women, 41.7 yr, BMI 42.73); 16 patients with obesity+T2D (40% women, 67.55 yr, BMI 33.38), 20 controls (50% women, 42.9 yr, BMI 22.7).                                                                                                                                                                                                                                                                      | +15b                                                                                                                                                       | -138, -376a, -503                                                                                                                                                                                      | Arrays: miRCURY LNA Universal RT cDNA Synthesis kit Human Panel I and II (742)<br>RT-qPCR: miRCURY LNA microRNA PCR System (Exiqon) | (Initial pools for arrays)<br>Reported data: ROC-AUC for each miRNA.<br>Normalized to miR-30c, 103, miR-191 and miR-423-3p.                                                                                                                                                                                                                  |
| <b>Murri 2013 (Spain)</b>      | Whole blood samples. 12 control women, 12 with PCOS, 12 men. 6 subjects per group with normal weight and 6 with obesity. Control: 29 yr, BMI 22 vs 37, PCOS: 27 yr, BMI 22 vs 39. Men: 30 yr, BMI 24 vs 43.                                                                                                                                                                                                                                                                                                    |                                                                                                                                                            | -21, -276, -103, -155                                                                                                                                                                                  | RT-PCR: TaqMan MicroRNA Reverse Transcription kit (4)                                                                               | Reported data: B-estimates<br>In whole blood, uncertain cellular origin of this miR.<br>Normalized to exogenous miR: RNU44 and RNU6b                                                                                                                                                                                                         |
| <b>Prats-Puig 2013 (Spain)</b> | Plasma samples. TaqMan array - discovery study: , 10 Caucasian boys, 5 with obesity (8.8 yr) vs 5 control (9.9 yr) RT-PCR - cross-sectional validation study: 85 control (9 yr, 49% girls) and 40 with obesity (9.2 yr, 55% girls) Longitudinal evaluation: same children, 23 boys and 22 girls, lean at baseline                                                                                                                                                                                              | +486-5p, +486-3p, +142-3p, +130b, +532-5p, +140-5p, +16-1, +222, +363, +122                                                                                | -221, -28-3p, -125b, -328                                                                                                                                                                              | TaqMan miRNA Low Density Arrays (754)<br>RT-PCR: TaqMan hydrolysis probes                                                           | Reported data: relative Log10-ratios, correlation coefficients and B-estimates<br>Normalized to 4 endogenous miR-106a, miR-146a, miR-19b and miR-223 (geometric mean)                                                                                                                                                                        |
| <b>Wang YC 2013 (China)</b>    | Serum samples. 21 Chinese lean men (48.95 yr, BMI 22.03) and 23 Chinese men with ow/ob (52.22 yr, BMI 27.25)                                                                                                                                                                                                                                                                                                                                                                                                   | +130b                                                                                                                                                      |                                                                                                                                                                                                        | RT-PCR. Prime Script RT reagent kit. (1)                                                                                            | Normalized to miR-223. The study includes a validation in mouse and cell culture.<br>Reported data: correlation coefficient and AUC-ROC.                                                                                                                                                                                                     |
| <b>Ortega 2013 (Spain)</b>     | Plasma samples. TaqMan array: , 32 white men (12 lean, 50 yr, BMI 23.7; 12 with obesity, BMI 33.1, 51 yr, 42% with T2D, 8 with morbid obesity, BMI 45.3, 46 yr, 50% T2D) (BMI 20-60) RT-qPCR: Replication in 80 patients: white men (49 lean: 49 yr, BMI 25.4; 19 with obesity: 51 yr, BMI 33.0, 37% with T2D; 12 with morbid obesity: 42 yr, BMI 45.5, 33% T2D). Longitudinal study: 5 men, 17 women, age 44 yr, BMI 42.9 (treated with surgery) and 9 treated with diet 5 men, 4 woman, age 47 yr, BMI 34.4. | Obese vs Lean<br>+140-5p, +142-3p, +222, +532-5p, +221, +423-5p, +21, +590-5p, +122, +483-5p, +636<br>Morbid obese vs Lean<br>+140-5p, +142-3p, +126, +222 | Obese vs Lean<br>-125b, -15a, -520c-3p, -193a-5p, -126, -625, -130b<br>Morbid obese vs Lean<br>-532-5p, -221, -423-5p, -21, -590-5p, -122, -483-5p, -636, -125b, -130b, -15a, -520c-3p, -193a-5p, -625 | TaqMan miRNA Arrays (754)<br>TaqMan Low Density Arrays<br>RT-qPCR: TaqMan Hydrolysis Probes.                                        | Normalized to 6 endogenous miR, analysing geometric means. Reported data: base log2-transformation.<br>Results were validated in 80 patients, and in a longitudinal cohort, in obese patients treated with diet or surgery.<br>We report results from comparisons in cross-sectional studies between obese (BMI 30-40) vs non-obese (BMI<30) |

With statistical significance  $p < 0.05$  in all cases.

Yr= years, BMI = body mass index, ppBMI: pre-pregnancy body mass index, GA: gestational age, GDM: gestational diabetes, PCOS: Polycystic ovarian syndrome, FHS: Framingham Heart Study, T2D: type 2 diabetes, NASH: non-alcoholic hepatic steatosis, SS: simple steatosis, IFG: impaired fasting glucose, IGT: impaired glucose tolerance, CVD: cardiovascular disease, RT-qPCR: real-time polymerase chain reaction.

Supplemental material 2b. miRNAs reported dysregulated in obesity.

| miRNA       |   | Sample | Population                                                                                                                                                                                                                                                                                                     | Reference        |
|-------------|---|--------|----------------------------------------------------------------------------------------------------------------------------------------------------------------------------------------------------------------------------------------------------------------------------------------------------------------|------------------|
| let-7a-5p   | d | Serum  | 12 women with PCOS, 12 control women, 12 men                                                                                                                                                                                                                                                                   | Murri 2018       |
| let-7b-3p   | o | Serum  | 12 women with PCOS, 12 control women, 12 men                                                                                                                                                                                                                                                                   | Murri 2018       |
| let-7c      | d | Serum  | 12 women with PCOS, 12 control women, 12 men                                                                                                                                                                                                                                                                   | Murri 2018       |
| let-7d-5p   | d | Serum  | 12 women with PCOS, 12 control women, 12 men                                                                                                                                                                                                                                                                   | Murri 2018       |
|             | o | Serum  | 9 children with obesity and 9 controls (discovery); 352 children with obesity, 106 with overweight, 146 controls (cross-sectional validation study); 101 adults with T2D and 82 controls (longitudinal validation study)                                                                                       | Cui X 2018       |
| let-7f-5p   | d | Serum  | 12 women with PCOS, 12 control women, 12 men                                                                                                                                                                                                                                                                   | Murri 2018       |
| let-7g-3p   | o | Serum  | 12 women with PCOS, 12 control women, 12 men                                                                                                                                                                                                                                                                   | Murri 2018       |
| miR-10a     | d | Serum  | Chinese adults. Arrays: 56 patients with obesity and 56 control. RT-qPCR Validation: 107 control and 123 subjects with obesity                                                                                                                                                                                 | Wang R 2015      |
| miR-15a     | d | Plasma | Array: 32 white men (12 control; 12 with obesity, 8 with morbid obesity). RT-qPCR: Replication in 80 patients: white men: 49 control; 19 with obesity; 12 with morbid obesity. Longitudinal study: 5 men, 17 women treated with surgery and 9 treated with diet 5 men, 4 woman.                                | Ortega 2013      |
| miR-15b     | o | Serum  | 13 patients with T2D, 20 patients with obesity; 16 patients with obesity+T2D, 20 controls                                                                                                                                                                                                                      | Pescador 2013    |
| miR-15b-5p  | o | Serum  | 9 children with obesity and 9 controls (discovery); 352 children with obesity, 106 with overweight, 146 controls (cross-sectional validation study); 101 adults with T2D and 82 controls (longitudinal validation study)                                                                                       | Cui X 2018       |
|             | o | Plasma | 10 healthy children; 20 children with obesity                                                                                                                                                                                                                                                                  | Thompson 2017    |
| miR-16-1    | o | Plasma | Discovery study: 10 Caucasian boys, 5 with obesity. Cross-sectional validation study: 85 control and 40 with obesity. Longitudinal evaluation: same children, 23 boys and 22 girls, lean at baseline                                                                                                           | Prats-Puig 2013  |
| miR-16-1-3p | o | Serum  | 12 women with PCOS, 12 control women, 12 men                                                                                                                                                                                                                                                                   | Murri 2018       |
| miR-16-5p   | o | Plasma | FHS Offspring Cohort, n=2317, Validation youth cohort: n= 90 ob/ow. Initial study RNAseq: n=40, 68.8 yr, BMI 28.2, 50% female, 50% with CVD                                                                                                                                                                    | Shah 2017        |
| miR-17      | d | Serum  | Chinese adults. Arrays: 56 patients with obesity and 56 control. RT-qPCR Validation: 107 control and 123 subjects with obesity                                                                                                                                                                                 | Wang R 2015      |
| miR-18a-5p  | d | Serum  | 12 women with PCOS, 12 control women, 12 men                                                                                                                                                                                                                                                                   | Murri 2018       |
| miR-19a-3p  | o | Serum  | 9 children with obesity and 9 controls (discovery); 352 children with obesity, 106 with overweight, 146 controls (cross-sectional validation study); 101 adults with T2D and 82 controls (longitudinal validation study)                                                                                       | Cui X 2018       |
|             | d | Serum  | 12 Italian children with obesity, 6 with insulin resistance, 6 with insulin sensitivity                                                                                                                                                                                                                        | Masotti 2017     |
| miR-19b     | d | Serum  | Chinese adults. Arrays: 56 patients with obesity and 56 control. RT-qPCR Validation: 107 control and 123 subjects with obesity                                                                                                                                                                                 | Wang R 2015      |
| miR-19b-3p  | o | Plasma | FHS Offspring Cohort, n=2317, Validation youth cohort: n= 90 ob/ow. Initial study RNAseq: n=40, 68.8 yr, BMI 28.2, 50% female, 50% with CVD                                                                                                                                                                    | Shah 2017        |
| miR-20a-5p  | o | Serum  | 9 children with obesity and 9 controls (discovery); 352 children with obesity, 106 with overweight, 146 controls (cross-sectional validation study); 101 adults with T2D and 82 controls (longitudinal validation study)                                                                                       | Cui X 2018       |
| miR-20b     | d | Serum  | Chinese adults. Arrays: 56 patients with obesity and 56 control. RT-qPCR Validation: 107 control and 123 subjects with obesity                                                                                                                                                                                 | Wang R 2015      |
| miR-21      | d | Serum  | Adults. 45 T2D, 42 non-T2D                                                                                                                                                                                                                                                                                     | Ghorbani 2017    |
|             | d | Plasma | *in morbid obesity vs control. Array: 32 white men (12 control; 12 with obesity, 8 with morbid obesity). RT-qPCR: Replication in 80 patients: white men: 49 control; 19 with obesity; 12 with morbid obesity. Longitudinal study: 5 men, 17 women treated with surgery and 9 treated with diet 5 men, 4 woman. | Ortega 2013      |
|             | o | Serum  | 57 adults, lean vs obesity groups; healthy or with prediabetes or T2D                                                                                                                                                                                                                                          | Nunez-Lopez 2016 |
|             | o | Plasma | Array: 32 white men (12 control; 12 with obesity, 8 with morbid obesity). RT-qPCR: Replication in 80 patients: white men: 49 control; 19 with obesity; 12 with morbid obesity. Longitudinal study: 5 men, 17 women treated with surgery and 9 treated with diet 5 men, 4 woman.                                | Ortega 2013      |
| miR-21-5p   | o | Serum  | 9 children with obesity and 9 controls (discovery); 352 children with obesity, 106 with overweight, 146 controls (cross-sectional validation study); 101 adults with T2D and 82 controls (longitudinal validation study)                                                                                       | Cui X 2018       |
|             | o | Plasma | 10 healthy children; 20 children with obesity                                                                                                                                                                                                                                                                  | Thompson 2017    |
| miR-23a     | o | Serum  | Women from East China. 18 women with PCOS, 30 control                                                                                                                                                                                                                                                          | Xiong 2017       |
| miR-23a-3p  | o | Serum  | 12 women with PCOS, 12 control women, 12 men                                                                                                                                                                                                                                                                   | Murri 2018       |
|             | o | Plasma | 10 healthy children; 20 children with obesity                                                                                                                                                                                                                                                                  | Thompson 2017    |
| miR-23b     | o | Serum  | Women from East China. 18 women with PCOS, 30 control                                                                                                                                                                                                                                                          | Xiong 2017       |
| miR-24      | o | Serum  | 57 adults, Lean vs obesity groups ; healthy or with prediabetes or T2D                                                                                                                                                                                                                                         | Nunez-Lopez 2016 |
| miR-24-3p   | o | Serum  | 12 women with PCOS, 12 control women, 12 men                                                                                                                                                                                                                                                                   | Murri 2018       |
|             | o | Plasma | FHS Offspring Cohort, n=2317, Validation youth cohort: n= 90 ob/ow. Initial study RNAseq: n=40, 68.8 yr, BMI 28.2, 50% female, 50% with CVD                                                                                                                                                                    | Shah 2017        |
| miR-25      | d | Serum  | 57 adults, lean vs obesity groups; healthy or with prediabetes or T2D                                                                                                                                                                                                                                          | Nunez-Lopez 2016 |
| miR-26b-5p  | o | Serum  | 9 children with obesity and 9 controls (discovery); 352 children with obesity, 106 with overweight, 146 controls (cross-sectional validation study); 101 adults with T2D and 82 controls (longitudinal validation study)                                                                                       | Cui X 2018       |
|             | o | Plasma | 20 Italian children, 10 with normal weight, 10 ob/ow                                                                                                                                                                                                                                                           | Iacomino 2016    |
|             | o | Serum  | 12 Italian children with obesity, 6 with insulin resistance, 6 with insulin sensitivity                                                                                                                                                                                                                        | Masotti 2017     |
| miR-27a     | o | Serum  | 57 adults, lean vs obesity groups ; healthy or with prediabetes or T2D                                                                                                                                                                                                                                         | Nunez-Lopez 2016 |
| miR-27a-3p  | o | Serum  | 9 children with obesity and 9 controls (discovery); 352 children with obesity, 106 with overweight, 146 controls (cross-sectional validation study); 101 adults with T2D and 82 controls (longitudinal validation study)                                                                                       | Cui X 2018       |
| miR-27b-3p  | o | Plasma | 10 healthy children; 20 children with obesity                                                                                                                                                                                                                                                                  | Thompson 2017    |
| miR-28-3p   | d | Plasma | Discovery study:10 Caucasian boys, 5 with obesity. Cross-sectional validation study: 85 control and 40 with obesity. Longitudinal evaluation: same children, 23 boys and 22 girls, lean at baseline                                                                                                            | Prats-Puig 2013  |
| miR-29a-3p  | o | Plasma | 10 healthy children; 20 children with obesity                                                                                                                                                                                                                                                                  | Thompson 2017    |
| miR-29c-3p  | o | Serum  | 12 women with PCOS, 12 control women, 12 men                                                                                                                                                                                                                                                                   | Murri 2018       |
| miR-30a     | o | Plasma | 300 Mexican-American women, mean 40 yr. Training set (arrays) n= 40, 47.5% obese at baseline, 72.5% at 5 yr of follow-up. Testing set 1, n=160, 47.5% obese at baseline, 54.4% at 5 yr. Testing set 2: n=100, 57% obese at baseline, 63% at 5 yr.                                                              | Zhao 2017        |



|                    |   |        |                                                                                                                                                                                                                                                                                                                |                      |
|--------------------|---|--------|----------------------------------------------------------------------------------------------------------------------------------------------------------------------------------------------------------------------------------------------------------------------------------------------------------------|----------------------|
|                    | d | Serum  | Chinese adults. Arrays: 56 patients with obesity and 56 control. RT-qPCR Validation: 107 control and 123 subjects with obesity                                                                                                                                                                                 | Wang R 2015          |
| <b>miR-30a-3p</b>  | o | Serum  | 9 children with obesity and 9 controls (discovery); 352 children with obesity, 106 with overweight, 146 controls (cross-sectional validation study); 101 adults with T2D and 82 controls (longitudinal validation study)                                                                                       | Cui X 2018           |
| <b>miR-30b</b>     | d | Serum  | Chinese adults. Arrays: 56 patients with obesity and 56 control. RT-qPCR Validation: 107 control and 123 subjects with obesity                                                                                                                                                                                 | Wang R 2015          |
| <b>miR-30b-5p</b>  | d | Serum  | 12 women with PCOS, 12 control women, 12 men                                                                                                                                                                                                                                                                   | Murri 2018           |
| <b>miR-30c</b>     | d | Serum  | Chinese adults. Arrays: 56 patients with obesity and 56 control. RT-qPCR Validation: 107 control and 123 subjects with obesity                                                                                                                                                                                 | Wang R 2015          |
| <b>miR-30c-5p</b>  | d | Serum  | 12 women with PCOS, 12 control women, 12 men                                                                                                                                                                                                                                                                   | Murri 2018           |
| <b>miR-30d-5p</b>  | o | Serum  | 9 children with obesity and 9 controls (discovery); 352 children with obesity, 106 with overweight, 146 controls (cross-sectional validation study); 101 adults with T2D and 82 controls (longitudinal validation study)                                                                                       | Cui X 2018           |
|                    | o | Plasma | FHS Offspring Cohort, n=2317, Validation youth cohort: n= 90 ob/ow. Initial study RNAseq: n=40, 68.8 yr, BMI 28.2, 50% female, 50% with CVD                                                                                                                                                                    | Shah 2017            |
| <b>miR-30e-5p</b>  | o | Serum  | 12 women with PCOS, 12 control women, 12 men                                                                                                                                                                                                                                                                   | Murri 2018           |
| <b>miR-31-5p</b>   | o | Plasma | 20 Italian children, 10 with normal weight, 10 ob/ow                                                                                                                                                                                                                                                           | Iacomino 2016        |
| <b>miR-33b</b>     | o | Serum  | 62 Women with morbid obesity, 30 with moderate obesity and 30 normal weight                                                                                                                                                                                                                                    | Auguet 2016          |
| <b>miR-34a</b>     | o | Serum  | 57 adults, lean vs obesity groups ; healthy or with prediabetes or T2D                                                                                                                                                                                                                                         | Nunez-Lopez 2016     |
| <b>miR-34a-5p</b>  | o | Plasma | 10 healthy children; 20 children with obesity                                                                                                                                                                                                                                                                  | Thompson 2017        |
|                    | o | Serum  | 12 Italian children with obesity, 6 with insulin resistance, 6 with insulin sensitivity                                                                                                                                                                                                                        | Masotti 2017         |
| <b>miR-93</b>      | d | Serum  | 57 adults, lean vs obesity groups ; healthy or with prediabetes or T2D                                                                                                                                                                                                                                         | Nunez-Lopez 2016     |
| <b>miR-95</b>      | d | Serum  | 12 Italian children with obesity, 6 with insulin resistance, 6 with insulin sensitivity                                                                                                                                                                                                                        | Masotti 2017         |
| <b>miR-98-5p</b>   | d | Serum  | 12 women with PCOS, 12 control women, 12 men                                                                                                                                                                                                                                                                   | Murri 2018           |
| <b>miR-99b-5p</b>  | o | Serum  | 9 children with obesity and 9 controls (discovery); 352 children with obesity, 106 with overweight, 146 controls (cross-sectional validation study); 101 adults with T2D and 82 controls (longitudinal validation study)                                                                                       | Cui X 2018           |
| <b>miR-103a-5p</b> | o | Plasma | 10 healthy children; 20 children with obesity                                                                                                                                                                                                                                                                  | Thompson 2017        |
| <b>miR-103a-3p</b> | d | Serum  | 12 women with PCOS, 12 control women, 12 men                                                                                                                                                                                                                                                                   | Murri 2018           |
| <b>miR-107</b>     | d | Serum  | 12 women with PCOS, 12 control women, 12 men                                                                                                                                                                                                                                                                   | Murri 2018           |
| <b>miR-122</b>     | o | Plasma | 300 Mexican-American women, mean 40 yr. Training set (arrays) n= 40, 47.5% obese at baseline, 72.5% at 5 yr of follow-up. Testing set 1, n=160, 47.5% obese at baseline, 54.4% at 5 yr. Testing set 2: n=100, 57% obese at baseline, 63% at 5 yr.                                                              | Zhao 2017            |
|                    | o | Serum  | 62 Women with morbid obesity, 30 with moderate obesity and 30 normal weight                                                                                                                                                                                                                                    | Auguet 2016          |
|                    | o | Serum  | Chinese adults. Arrays: 56 patients with obesity and 56 control. RT-qPCR Validation: 107 control and 123 subjects with obesity                                                                                                                                                                                 | Wang R 2015          |
|                    | o | Plasma | Discovery study: , 10 Caucasian boys, 5 with obesity. Cross-sectional validation study: 85 control and 40 with obesity. Longitudinal evaluation: same children, 23 boys and 22 girls, lean at baseline                                                                                                         | Prats-Puig 2013      |
|                    | o | Plasma | Array: 32 white men (12 control; 12 with obesity, 8 with morbid obesity). RT-qPCR: Replication in 80 patients: white men: 49 control; 19 with obesity; 12 with morbid obesity. Longitudinal study: 5 men, 17 women treated with surgery and 9 treated with diet 5 men, 4 woman.                                | Ortega 2013          |
|                    | d | Plasma | *in morbid obesity vs control. Array: 32 white men (12 control; 12 with obesity, 8 with morbid obesity). RT-qPCR: Replication in 80 patients: white men: 49 control; 19 with obesity; 12 with morbid obesity. Longitudinal study: 5 men, 17 women treated with surgery and 9 treated with diet 5 men, 4 woman. | Ortega 2013          |
| <b>miR-122-5p</b>  | o | Serum  | 12 women with PCOS, 12 control women, 12 men                                                                                                                                                                                                                                                                   | Murri 2018           |
|                    | o | Plasma | 10 healthy children; 20 children with obesity                                                                                                                                                                                                                                                                  | Thompson 2017        |
|                    | o | Plasma | FHS Offspring Cohort, n=2317, Validation youth cohort: n= 90 ob/ow. Initial study RNAseq: n=40, 68.8 yr, BMI 28.2, 50% female, 50% with CVD                                                                                                                                                                    | Shah 2017            |
|                    | o | S/P    | 810 Caucasian adults, 50% female, 63 yr; BMI 26, free of preexisting disease at baseline. 136 developed metabolic syndrome, 57 T2D after 10 years:1995-2005                                                                                                                                                    | Willeit 2017         |
|                    | o | Serum  | 12 Italian children with obesity, 6 with insulin resistance, 6 with insulin sensitivity                                                                                                                                                                                                                        | Masotti 2017         |
|                    | d | Plasma | 70 pregnant Caucasian women; 20 pregestational obesity, 25 gestational obesity, 25 normal pregnancies                                                                                                                                                                                                          | Carreras-Badosa 2015 |
| <b>miR-125b</b>    | d | Plasma | 300 Mexican-American women. Training set (arrays) n= 40, 47.5% obese at baseline, 72.5% at 5 yr of follow-up Testing set 1, n=160, 47.5% obese at baseline, 54.4% at 5 yr. Testing set 2: n=100, 57% obese at baseline, 63% at 5 yr.                                                                           | Zhao 2017            |
|                    | d | Plasma | Discovery study: 10 Caucasian boys, 5 with obesity. Cross-sectional validation study: 85 control and 40 with obesity. Longitudinal evaluation: same children, 23 boys and 22 girls, lean at baseline                                                                                                           | Prats-Puig 2013      |
|                    | d | Plasma | Array: 32 white men (12 control; 12 with obesity, 8 with morbid obesity). RT-qPCR: Replication in 80 patients: white men: 49 control; 19 with obesity; 12 with morbid obesity. Longitudinal study: 5 men, 17 women treated with surgery and 9 treated with diet 5 men, 4 woman.                                | Ortega 2013          |
| <b>miR-126</b>     | o | Serum  | 57 adults, lean vs obesity groups ; healthy or with prediabetes or T2D                                                                                                                                                                                                                                         | Nunez-Lopez 2016     |
|                    | o | Plasma | *in morbid obesity vs control. Array: 32 white men (12 control; 12 with obesity, 8 with morbid obesity). RT-qPCR: Replication in 80 patients: white men: 49 control; 19 with obesity; 12 with morbid obesity. Longitudinal study: 5 men, 17 women treated with surgery and 9 treated with diet 5 men, 4 woman. | Ortega 2013          |
|                    | d | Plasma | Array: 32 white men (12 control; 12 with obesity, 8 with morbid obesity). RT-qPCR: Replication in 80 patients: white men: 49 control; 19 with obesity; 12 with morbid obesity. Longitudinal study: 5 men, 17 women treated with surgery and 9 treated with diet 5 men, 4 woman.                                | Ortega 2013          |
| <b>miR-126*</b>    | d | Serum  | Chinese adults. Arrays: 56 patients with obesity and 56 control. RT-qPCR Validation: 107 control and 123 subjects with obesity                                                                                                                                                                                 | Wang R 2015          |
| <b>miR-130b</b>    | d | Plasma | 57 age and gender matched subjects: 40 heart-failure patients, 17 healthy controls                                                                                                                                                                                                                             | Thomé 2015           |
|                    | d | Plasma | Array: 32 white men (12 control; 12 with obesity, 8 with morbid obesity). RT-qPCR: Replication in 80 patients: white men: 49 control; 19 with obesity; 12 with morbid obesity. Longitudinal study: 5 men, 17 women treated with surgery and 9 treated with diet 5 men, 4 woman.                                | Ortega 2013          |
|                    | o | Plasma | Discovery study: 10 Caucasian boys, 5 with obesity. Cross-sectional validation study: 85 control and 40 with obesity. Longitudinal evaluation: same children, 23 boys and 22 girls, lean at baseline                                                                                                           | Prats-Puig 2013      |
|                    | o | Serum  | 21 Chinese men with normal weight, 23 Chinese men with ow/ob                                                                                                                                                                                                                                                   | Wang YC 2013         |
| <b>miR-130b-3p</b> | o | Serum  | 9 children with obesity and 9 controls (discovery); 352 children with obesity, 106 with overweight, 146 controls (cross-sectional validation study); 101 adults with T2D and 82 controls (longitudinal validation study)                                                                                       | Cui X 2018           |

|                      |   |        |                                                                                                                                                                                                                                                                                 |                  |
|----------------------|---|--------|---------------------------------------------------------------------------------------------------------------------------------------------------------------------------------------------------------------------------------------------------------------------------------|------------------|
| <b>miR-136-5p</b>    | d | Plasma | 20 Italian children, 10 with normal weight, 10 ob/ow                                                                                                                                                                                                                            | Iacomino 2016    |
| <b>miR-138</b>       | d | Serum  | 13 patients with T2D, 20 patients with obesity; 16 patients with obesity+T2D, 20 controls                                                                                                                                                                                       | Pescador 2013    |
| <b>miR-140-3p</b>    | d | Serum  | Chinese adults. Arrays: 56 patients with obesity and 56 control. RT-qPCR Validation: 107 control and 123 subjects with obesity                                                                                                                                                  | Wang R 2015      |
| <b>miR-140-5p</b>    | o | Serum  | 12 women with PCOS, 12 control women, 12 men                                                                                                                                                                                                                                    | Murri 2018       |
|                      | o | Plasma | Discovery study: 10 Caucasian boys, 5 with obesity. Cross-sectional validation study: 85 control and 40 with obesity. Longitudinal evaluation: same children, 23 boys and 22 girls, lean at baseline                                                                            | Prats-Puig 2013  |
|                      | o | Plasma | Array: 32 white men (12 control; 12 with obesity, 8 with morbid obesity). RT-qPCR: Replication in 80 patients: white men: 49 control; 19 with obesity; 12 with morbid obesity. Longitudinal study: 5 men, 17 women treated with surgery and 9 treated with diet 5 men, 4 woman. | Ortega 2013      |
|                      | d | Serum  | Chinese adults. Arrays: 56 patients with obesity and 56 control. RT-qPCR Validation: 107 control and 123 subjects with obesity                                                                                                                                                  | Wang R 2015      |
| <b>miR-142</b>       | o | Plasma | 300 Mexican-American women. Training set (arrays) n= 40, 47.5% obese at baseline, 72.5% at 5 yr of follow-up. Testing set 1, n=160, 47.5% obese at baseline, 54.4% at 5 yr. Testing set 2: n=100, 57% obese at baseline, 63% at 5 yr.                                           | Zhao 2017        |
| <b>miR-142-5p</b>    | o | Serum  | 12 women with PCOS, 12 control women, 12 men                                                                                                                                                                                                                                    | Murri 2018       |
|                      | d | Serum  | Chinese adults. Arrays: 56 patients with obesity and 56 control. RT-qPCR Validation: 107 control and 123 subjects with obesity                                                                                                                                                  | Wang R 2015      |
| <b>miR-142-3p</b>    | o | Plasma | Discovery study: 10 Caucasian boys, 5 with obesity. Cross-sectional validation study: 85 control and 40 with obesity. Longitudinal evaluation: same children, 23 boys and 22 girls, lean at baseline                                                                            | Prats-Puig 2013  |
|                      | o | Plasma | Array: 32 white men (12 control; 12 with obesity, 8 with morbid obesity). RT-qPCR: Replication in 80 patients: white men: 49 control; 19 with obesity; 12 with morbid obesity. Longitudinal study: 5 men, 17 women treated with surgery and 9 treated with diet 5 men, 4 woman. | Ortega 2013      |
| <b>miR-143-3p</b>    | o | Serum  | 12 women with PCOS, 12 control women, 12 men                                                                                                                                                                                                                                    | Murri 2018       |
| <b>miR-144*</b>      | d | Serum  | Chinese adults. Arrays: 56 patients with obesity and 56 control. RT-qPCR Validation: 107 control and 123 subjects with obesity                                                                                                                                                  | Wang R 2015      |
| <b>miR-146a</b>      | o | Serum  | 57 adults, lean vs obesity groups ; healthy or with prediabetes or T2D                                                                                                                                                                                                          | Nunez-Lopez 2016 |
| <b>miR-146a-5p</b>   | o | Serum  | 9 children with obesity and 9 controls (discovery); 352 children with obesity, 106 with overweight, 146 controls (cross-sectional validation study). 101 adults with T2D and 82 controls (longitudinal validation study)                                                        | Cui X 2018       |
|                      | o | Serum  | 12 Italian children with obesity, 6 with insulin resistance, 6 with insulin sensitivity                                                                                                                                                                                         | Masotti 2017     |
| <b>miR-146b-5p</b>   | o | Serum  | 9 children with obesity and 9 controls (discovery); 352 children with obesity, 106 with overweight, 146 controls (cross-sectional validation study). 101 adults with T2D and 82 controls (longitudinal validation study)                                                        | Cui X 2018       |
| <b>miR-148a</b>      | o | Serum  | 57 adults, lean vs obesity groups ; healthy or with prediabetes or T2D                                                                                                                                                                                                          | Nunez-Lopez 2016 |
| <b>miR-148a-3p</b>   | o | Serum  | 12 women with PCOS, 12 control women, 12 men                                                                                                                                                                                                                                    | Murri 2018       |
|                      | o | Serum  | 9 children with obesity and 9 controls (discovery); 352 children with obesity, 106 with overweight, 146 controls (cross-sectional validation study). 101 adults with T2D and 82 controls (longitudinal validation study)                                                        | Cui X 2018       |
| <b>miR-148b</b>      | d | Serum  | Chinese adults. Arrays: 56 patients with obesity and 56 control. RT-qPCR Validation: 107 control and 123 subjects with obesity                                                                                                                                                  | Wang R 2015      |
| <b>miR-148b-3p</b>   | o | Serum  | 12 Italian children with obesity, 6 with insulin resistance, 6 with insulin sensitivity                                                                                                                                                                                         | Masotti 2017     |
| <b>miR-150</b>       | d | Serum  | 57 adults, lean vs obesity groups ; healthy or with prediabetes or T2D                                                                                                                                                                                                          | Nunez-Lopez 2016 |
| <b>miR-151-3p</b>    | d | Serum  | Chinese adults. Arrays: 56 patients with obesity and 56 control. RT-qPCR Validation: 107 control and 123 subjects with obesity                                                                                                                                                  | Wang R 2015      |
| <b>miR-151-5p</b>    | d | Serum  | Chinese adults. Arrays: 56 patients with obesity and 56 control. RT-qPCR Validation: 107 control and 123 subjects with obesity                                                                                                                                                  | Wang R 2015      |
| <b>miR-151a-3p</b>   | d | Serum  | 12 women with PCOS, 12 control women, 12 men                                                                                                                                                                                                                                    | Murri 2018       |
| <b>miR-151a-5p</b>   | d | Serum  | 12 women with PCOS, 12 control women, 12 men                                                                                                                                                                                                                                    | Murri 2018       |
| <b>miR-152</b>       | o | Serum  | 57 adults, lean vs obesity groups ; healthy or with prediabetes or T2D                                                                                                                                                                                                          | Nunez-Lopez 2016 |
| <b>miR-155-5p</b>    | o | Plasma | 10 healthy children; 20 children with obesity                                                                                                                                                                                                                                   | Thompson 2017    |
| <b>miR-181a-2-3p</b> | d | Serum  | 12 women with PCOS, 12 control women, 12 men                                                                                                                                                                                                                                    | Murri 2018       |
| <b>miR-181b-5p</b>   | o | Plasma | 10 healthy children; 20 children with obesity                                                                                                                                                                                                                                   | Thompson 2017    |
| <b>miR-181c-3p</b>   | o | Serum  | 12 women with PCOS, 12 control women, 12 men                                                                                                                                                                                                                                    | Murri 2018       |
| <b>miR-186</b>       | d | Serum  | Chinese adults. Arrays: 56 patients with obesity and 56 control. RT-qPCR Validation: 107 control and 123 subjects with obesity                                                                                                                                                  | Wang R 2015      |
| <b>miR-190a</b>      | d | Serum  | 12 Italian children with obesity, 6 with insulin resistance, 6 with insulin sensitivity                                                                                                                                                                                         | Masotti 2017     |
| <b>miR-191-5p</b>    | o | Plasma | 10 healthy children; 20 children with obesity                                                                                                                                                                                                                                   | Thompson 2017    |
|                      | o | Plasma | FHS Offspring Cohort, n=2317, Validation youth cohort: n= 90 ob/ow. Initial study RNAseq: n=40, 68.8 yr, BMI 28.2, 50% female, 50% with CVD                                                                                                                                     | Shah 2017        |
| <b>miR-192-5p</b>    | o | Serum  | 12 women with PCOS, 12 control women, 12 men                                                                                                                                                                                                                                    | Murri 2018       |
|                      | o | Plasma | 10 healthy children; 20 children with obesity                                                                                                                                                                                                                                   | Thompson 2017    |
|                      | o | Plasma | FHS Offspring Cohort, n=2317, Validation youth cohort: n= 90 ob/ow. Initial study RNAseq: n=40, 68.8 yr, BMI 28.2, 50% female, 50% with CVD                                                                                                                                     | Shah 2017        |
| <b>miR-193a-5p</b>   | o | Serum  | 12 women with PCOS, 12 control women, 12 men                                                                                                                                                                                                                                    | Murri 2018       |
|                      | d | Plasma | Array: 32 white men (12 control; 12 with obesity, 8 with morbid obesity). RT-qPCR: Replication in 80 patients: white men: 49 control; 19 with obesity; 12 with morbid obesity. Longitudinal study: 5 men, 17 women treated with surgery and 9 treated with diet 5 men, 4 woman. | Ortega 2013      |
| <b>miR-194-5p</b>    | o | Plasma | FHS Offspring Cohort, n=2317, Validation youth cohort: n= 90 ob/ow. Initial study RNAseq: n=40, 68.8 yr, BMI 28.2, 50% female, 50% with CVD                                                                                                                                     | Shah 2017        |
| <b>miR-195</b>       | d | Serum  | Chinese adults. Arrays: 56 patients with obesity and 56 control. RT-qPCR Validation: 107 control and 123 subjects with obesity                                                                                                                                                  | Wang R 2015      |
| <b>miR-197-3p</b>    | o | Serum  | 12 women with PCOS, 12 control women, 12 men                                                                                                                                                                                                                                    | Murri 2018       |
|                      | o | Plasma | FHS Offspring Cohort, n=2317, Validation youth cohort: n= 90 ob/ow. Initial study RNAseq: n=40, 68.8 yr, BMI 28.2, 50% female, 50% with CVD                                                                                                                                     | Shah 2017        |
| <b>miR-199a-3p</b>   | d | Serum  | 12 women with PCOS, 12 control women, 12 men                                                                                                                                                                                                                                    | Murri 2018       |
| <b>miR-199a-5p</b>   | d | Serum  | 12 women with PCOS, 12 control women, 12 men                                                                                                                                                                                                                                    | Murri 2018       |
|                      | o | Plasma | 10 healthy children; 20 children with obesity                                                                                                                                                                                                                                   | Thompson 2017    |
|                      | d | Serum  | Chinese adults. Arrays: 56 patients with obesity and 56 control. RT-qPCR Validation: 107 control and 123 subjects with obesity                                                                                                                                                  | Wang R 2015      |

|             |   |        |                                                                                                                                                                                                                                                                                                                |                      |
|-------------|---|--------|----------------------------------------------------------------------------------------------------------------------------------------------------------------------------------------------------------------------------------------------------------------------------------------------------------------|----------------------|
| miR-200c-3p | d | Serum  | 12 Italian children with obesity, 6 with insulin resistance, 6 with insulin sensitivity                                                                                                                                                                                                                        | Masotti 2017         |
| miR-203a    | o | Serum  | 12 women with PCOS, 12 control women, 12 men                                                                                                                                                                                                                                                                   | Murri 2018           |
| miR-205-5p  | d | Serum  | 12 Italian children with obesity, 6 with insulin resistance, 6 with insulin sensitivity                                                                                                                                                                                                                        | Masotti 2017         |
| miR-206     | d | Plasma | 20 Italian children, 10 with normal weight, 10 ob/ow                                                                                                                                                                                                                                                           | Iacomino 2016        |
| miR-210-3p  | o | Plasma | Pregnant women, 36 with GDM, 80 normal controls                                                                                                                                                                                                                                                                | Wander 2017          |
| miR-214-5p  | o | Plasma | 10 healthy children; 20 children with obesity                                                                                                                                                                                                                                                                  | Thompson 2017        |
| miR-221     | d | Plasma | Discovery study: 10 Caucasian boys, 5 with obesity. Cross-sectional validation study: 85 control and 40 with obesity. Longitudinal evaluation: same children, 23 boys and 22 girls, lean at baseline                                                                                                           | Prats-Puig 2013      |
|             | o | Plasma | Array: 32 white men (12 control; 12 with obesity, 8 with morbid obesity). RT-qPCR: Replication in 80 patients: white men: 49 control; 19 with obesity; 12 with morbid obesity. Longitudinal study: 5 men, 17 women treated with surgery and 9 treated with diet 5 men, 4 woman.                                | Ortega 2013          |
|             | d | Plasma | *in morbid obesity vs control. Array: 32 white men (12 control; 12 with obesity, 8 with morbid obesity). RT-qPCR: Replication in 80 patients: white men: 49 control; 19 with obesity; 12 with morbid obesity. Longitudinal study: 5 men, 17 women treated with surgery and 9 treated with diet 5 men, 4 woman. | Ortega 2013          |
| miR-222     | o | Plasma | Discovery study: 10 Caucasian boys, 5 with obesity. Cross-sectional validation study: 85 control and 40 with obesity. Longitudinal evaluation: same children, 23 boys and 22 girls, lean at baseline                                                                                                           | Prats-Puig 2013      |
|             | o | Plasma | Array: 32 white men (12 control; 12 with obesity, 8 with morbid obesity). RT-qPCR: Replication in 80 patients: white men: 49 control; 19 with obesity; 12 with morbid obesity. Longitudinal study: 5 men, 17 women treated with surgery and 9 treated with diet 5 men, 4 woman.                                | Ortega 2013          |
| miR-222-3p  | o | Serum  | 9 children with obesity and 9 controls (discovery); 352 children with obesity, 106 with overweight, 146 controls (cross-sectional validation study). 101 adults with T2D and 82 controls (longitudinal validation study)                                                                                       | Cui X 2018           |
|             | o | Plasma | 10 healthy children; 20 children with obesity                                                                                                                                                                                                                                                                  | Thompson 2017        |
| miR-223-3p  | o | Serum  | 12 women with PCOS, 12 control women, 12 men                                                                                                                                                                                                                                                                   | Murri 2018           |
|             | o | Plasma | 10 healthy children; 20 children with obesity                                                                                                                                                                                                                                                                  | Thompson 2017        |
| miR-223-5p  | o | Serum  | 12 women with PCOS, 12 control women, 12 men                                                                                                                                                                                                                                                                   | Murri 2018           |
| miR-223     | o | Serum  | 57 adults, lean vs obesity groups; healthy or with prediabetes or T2D                                                                                                                                                                                                                                          | Nunez-Lopez 2016     |
|             | d | Serum  | 41 Asian adults with normal-weight; 40 with overweight; 40 with obesity                                                                                                                                                                                                                                        | Wen 2015             |
| miR-223*    | d | Serum  | Chinese adults. Arrays: 56 patients with obesity and 56 control. RT-qPCR Validation: 107 control and 123 subjects with obesity                                                                                                                                                                                 | Wang R 2015          |
| miR-301a    | d | Serum  | Chinese adults. Arrays: 56 patients with obesity and 56 control. RT-qPCR Validation: 107 control and 123 subjects with obesity                                                                                                                                                                                 | Wang R 2015          |
| miR-301b-3p | o | Plasma | FHS Offspring Cohort, n=2317, Validation youth cohort: n= 90 ob/ow. Initial study RNAseq: n=40, 68.8 yr, BMI 28.2, 50% female, 50% with CVD                                                                                                                                                                    | Shah 2017            |
| miR-302c-5p | o | Serum  | 12 women with PCOS, 12 control women, 12 men                                                                                                                                                                                                                                                                   | Murri 2018           |
| miR-320a    | o | Plasma | FHS Offspring Cohort, n=2317, Validation youth cohort: n= 90 ob/ow. Initial study RNAseq: n=40, 68.8 yr, BMI 28.2, 50% female, 50% with CVD                                                                                                                                                                    | Shah 2017            |
|             | d | Plasma | 20 Italian children, 10 with normal weight, 10 ob/ow                                                                                                                                                                                                                                                           | Iacomino 2016        |
|             | o | Serum  | 12 Italian children with obesity, 6 with insulin resistance, 6 with insulin sensitivity                                                                                                                                                                                                                        | Masotti 2017         |
| miR-320b    | d | Plasma | FHS Offspring Cohort, n=2317, Validation youth cohort: n= 90 ob/ow. Initial study RNAseq: n=40, 68.8 yr, BMI 28.2, 50% female, 50% with CVD                                                                                                                                                                    | Shah 2017            |
| miR-324-3p  | d | Plasma | 70 pregnant Caucasian women; 20 pregestational obesity, 25 gestational obesity, 25 normal pregnancies                                                                                                                                                                                                          | Carreras-Badosa 2015 |
|             | d | Serum  | Chinese adults. Arrays: 56 patients with obesity and 56 control. RT-qPCR Validation: 107 control and 123 subjects with obesity                                                                                                                                                                                 | Wang R 2015          |
| miR-328     | d | Plasma | Discovery study: 10 Caucasian boys, 5 with obesity. Cross-sectional validation study: 85 control and 40 with obesity. Longitudinal evaluation: same children, 23 boys and 22 girls, lean at baseline                                                                                                           | Prats-Puig 2013      |
| miR-331-3p  | d | Serum  | 12 women with PCOS, 12 control women, 12 men                                                                                                                                                                                                                                                                   | Murri 2018           |
|             | d | Serum  | Chinese adults. Arrays: 56 patients with obesity and 56 control. RT-qPCR Validation: 107 control and 123 subjects with obesity                                                                                                                                                                                 | Wang R 2015          |
| miR-335     | d | Serum  | Chinese adults. Arrays: 56 patients with obesity and 56 control. RT-qPCR Validation: 107 control and 123 subjects with obesity                                                                                                                                                                                 | Wang R 2015          |
| miR-338-3p  | o | Serum  | 12 women with PCOS, 12 control women, 12 men                                                                                                                                                                                                                                                                   | Murri 2018           |
|             | d | Serum  | Chinese adults. Arrays: 56 patients with obesity and 56 control. RT-qPCR Validation: 107 control and 123 subjects with obesity                                                                                                                                                                                 | Wang R 2015          |
| miR-342-3p  | o | Plasma | FHS Offspring Cohort, n=2317, Validation youth cohort: n= 90 ob/ow. Initial study RNAseq: n=40, 68.8 yr, BMI 28.2, 50% female, 50% with CVD                                                                                                                                                                    | Shah 2017            |
|             | o | Serum  | 12 Italian children with obesity, 6 with insulin resistance, 6 with insulin sensitivity                                                                                                                                                                                                                        | Masotti 2017         |
| miR-345-5p  | o | Serum  | 12 women with PCOS, 12 control women, 12 men                                                                                                                                                                                                                                                                   | Murri 2018           |
| miR-361-3p  | d | Plasma | 20 Italian children, 10 with normal weight, 10 ob/ow                                                                                                                                                                                                                                                           | Iacomino 2016        |
| miR-361-5p  | o | Serum  | 12 women with PCOS, 12 control women, 12 men                                                                                                                                                                                                                                                                   | Murri 2018           |
|             | d | Serum  | Chinese adults. Arrays: 56 patients with obesity and 56 control. RT-qPCR Validation: 107 control and 123 subjects with obesity                                                                                                                                                                                 | Wang R 2015          |
| miR-363     | o | Plasma | Discovery study: 10 Caucasian boys, 5 with obesity. Cross-sectional validation study: 85 control and 40 with obesity. Longitudinal evaluation: same children, 23 boys and 22 girls, lean at baseline                                                                                                           | Prats-Puig 2013      |
| miR-365a-3p | o | Serum  | 12 women with PCOS, 12 control women, 12 men                                                                                                                                                                                                                                                                   | Murri 2018           |
| miR-375     | o | Serum  | 9 children with obesity and 9 controls (discovery); 352 children with obesity, 106 with overweight, 146 controls (cross-sectional validation study). 101 adults with T2D and 82 controls (longitudinal validation study)                                                                                       | Cui X 2018           |
|             | d | Plasma | 70 pregnant Caucasian women; 20 pregestational obesity, 25 gestational obesity, 25 normal pregnancies                                                                                                                                                                                                          | Carreras-Badosa 2015 |
| miR-376a    | d | Serum  | 13 patients with T2D, 20 patients with obesity; 16 patients with obesity+T2D, 20 controls                                                                                                                                                                                                                      | Pescador 2013        |
| miR-378a-3p | o | Serum  | 12 women with PCOS, 12 control women, 12 men                                                                                                                                                                                                                                                                   | Murri 2018           |
| miR-378a-5p | o | Serum  | 12 women with PCOS, 12 control women, 12 men                                                                                                                                                                                                                                                                   | Murri 2018           |
| miR-379-3p  | d | Serum  | 12 women with PCOS, 12 control women, 12 men                                                                                                                                                                                                                                                                   | Murri 2018           |
| miR-423-5p  | o | Plasma | Discovery study: 10 Caucasian boys, 5 with obesity. Cross-sectional validation study: 85 control and 40 with obesity. Longitudinal evaluation: same children, 23 boys and 22 girls, lean at baseline                                                                                                           | Prats-Puig 2013      |

|             |   |        |                                                                                                                                                                                                                                                                                                                |                      |
|-------------|---|--------|----------------------------------------------------------------------------------------------------------------------------------------------------------------------------------------------------------------------------------------------------------------------------------------------------------------|----------------------|
|             | o | Plasma | Array: 32 white men (12 control; 12 with obesity, 8 with morbid obesity). RT-qPCR: Replication in 80 patients: white men: 49 control; 19 with obesity; 12 with morbid obesity. Longitudinal study: 5 men, 17 women treated with surgery and 9 treated with diet 5 men, 4 woman.                                | Ortega 2013          |
|             | d | Plasma | *in morbid obesity vs control. Array: 32 white men (12 control; 12 with obesity, 8 with morbid obesity). RT-qPCR: Replication in 80 patients: white men: 49 control; 19 with obesity; 12 with morbid obesity. Longitudinal study: 5 men, 17 women treated with surgery and 9 treated with diet 5 men, 4 woman. | Ortega 2013          |
| miR-424-5p  | o | Serum  | 12 women with PCOS, 12 control women, 12 men                                                                                                                                                                                                                                                                   | Murri 2018           |
| miR-425-3p  | o | Serum  | 12 women with PCOS, 12 control women, 12 men                                                                                                                                                                                                                                                                   | Murri 2018           |
| miR-425-5p  | o | Serum  | 12 women with PCOS, 12 control women, 12 men                                                                                                                                                                                                                                                                   | Murri 2018           |
| miR-431-5p  | d | Serum  | 12 women with PCOS, 12 control women, 12 men                                                                                                                                                                                                                                                                   | Murri 2018           |
| miR-483-5p  | o | Plasma | Array: 32 white men (12 control; 12 with obesity, 8 with morbid obesity). RT-qPCR: Replication in 80 patients: white men: 49 control; 19 with obesity; 12 with morbid obesity. Longitudinal study: 5 men, 17 women treated with surgery and 9 treated with diet 5 men, 4 woman.                                | Ortega 2013          |
|             | d | Plasma | *in morbid obesity vs control. Array: 32 white men (12 control; 12 with obesity, 8 with morbid obesity). RT-qPCR: Replication in 80 patients: white men: 49 control; 19 with obesity; 12 with morbid obesity. Longitudinal study: 5 men, 17 women treated with surgery and 9 treated with diet 5 men, 4 woman. | Ortega 2013          |
| miR-486-5p  | o | Serum  | 9 children with obesity and 9 controls (discovery); 352 children with obesity, 106 with overweight, 146 controls (cross-sectional validation study), 101 adults with T2D and 82 controls (longitudinal validation study)                                                                                       | Cui X 2018           |
|             | o | Plasma | FHS Offspring Cohort, n=2317, Validation youth cohort: n= 90 ob/ow. Initial study RNAseq: n=40, 68.8 yr, BMI 28.2, 50% female, 50% with CVD                                                                                                                                                                    | Shah 2017            |
|             | o | Plasma | Discovery study: 10 Caucasian boys, 5 with obesity. Cross-sectional validation study: 85 control and 40 with obesity. Longitudinal evaluation: same children, 23 boys and 22 girls, lean at baseline                                                                                                           | Prats-Puig 2013      |
| miR-486-3p  | o | Plasma | Discovery study: 10 Caucasian boys, 5 with obesity. Cross-sectional validation study: 85 control and 40 with obesity. Longitudinal evaluation: same children, 23 boys and 22 girls, lean at baseline                                                                                                           | Prats-Puig 2013      |
| miR-494     | d | Serum  | Chinese adults. Arrays: 56 patients with obesity and 56 control. RT-qPCR Validation: 107 control and 123 subjects with obesity                                                                                                                                                                                 | Wang R 2015          |
| miR-503     | d | Serum  | 13 patients with T2D, 20 patients with obesity; 16 patients with obesity+T2D, 20 controls                                                                                                                                                                                                                      | Pescador 2013        |
| miR-505-3p  | o | Serum  | 12 Italian children with obesity, 6 with insulin resistance, 6 with insulin sensitivity                                                                                                                                                                                                                        | Masotti 2017         |
| miR-519d    | o | Plasma | 300 Mexican-American women. Training set (arrays) n=40, 47.5% obese at baseline, 72.5% at 5 yr of follow-up Testing set 1, n=160, 47.5% obese at baseline, 54.4% at 5 yr. Testing set 2: n=100, 57% obese at baseline, 63% at 5 yr.                                                                            | Zhao 2017            |
| miR-520c-3p | d | Plasma | Array: , 32 white men (12 control; 12 with obesity, 8 with morbid obesity). RT-qPCR: Replication in 80 patients: white men: 49 control; 19 with obesity; 12 with morbid obesity. Longitudinal study: 5 men, 17 women treated with surgery and 9 treated with diet 5 men, 4 woman.                              | Ortega 2013          |
| miR-532-5p  | o | Plasma | Discovery study: , 10 Caucasian boys, 5 with obesity. Cross-sectional validation study: 85 control and 40 with obesity. Longitudinal evaluation: same children, 23 boys and 22 girls, lean at baseline                                                                                                         | Prats-Puig 2013      |
|             | o | Plasma | Array: , 32 white men (12 control; 12 with obesity, 8 with morbid obesity). RT-qPCR: Replication in 80 patients: white men: 49 control; 19 with obesity; 12 with morbid obesity. Longitudinal study: 5 men, 17 women treated with surgery and 9 treated with diet 5 men, 4 woman.                              | Ortega 2013          |
|             | d | Plasma | *in morbid obesity vs control. Array: 32 white men (12 control; 12 with obesity, 8 with morbid obesity). RT-qPCR: Replication in 80 patients: white men: 49 control; 19 with obesity; 12 with morbid obesity. Longitudinal study: 5 men, 17 women treated with surgery and 9 treated with diet 5 men, 4 woman. | Ortega 2013          |
| miR-550a    | d | Serum  | Chinese adults. Arrays: 56 patients with obesity and 56 control. RT-qPCR Validation: 107 control and 123 subjects with obesity                                                                                                                                                                                 | Wang R 2015          |
| miR-574-3p  | o | Plasma | FHS Offspring Cohort, n=2317, Validation youth cohort: n= 90 ob/ow. Initial study RNAseq: n=40, 68.8 yr, BMI 28.2, 50% female, 50% with CVD                                                                                                                                                                    | Shah 2017            |
| miR-574-5p  | o | Serum  | Chinese adults. Arrays: 56 patients with obesity and 56 control. RT-qPCR Validation: 107 control and 123 subjects with obesity                                                                                                                                                                                 | Wang R 2015          |
| miR-582-5p  | o | Serum  | 12 women with PCOS, 12 control women, 12 men                                                                                                                                                                                                                                                                   | Murri 2018           |
| miR-590-5p  | d | Serum  | Chinese adults. Arrays: 56 patients with obesity and 56 control. RT-qPCR Validation: 107 control and 123 subjects with obesity                                                                                                                                                                                 | Wang R 2015          |
|             | o | Plasma | Array: 32 white men (12 control; 12 with obesity, 8 with morbid obesity). RT-qPCR: Replication in 80 patients: white men: 49 control; 19 with obesity; 12 with morbid obesity. Longitudinal study: 5 men, 17 women treated with surgery and 9 treated with diet 5 men, 4 woman.                                | Ortega 2013          |
|             | d | Plasma | *in morbid obesity vs control. Array: 32 white men (12 control; 12 with obesity, 8 with morbid obesity). RT-qPCR: Replication in 80 patients: white men: 49 control; 19 with obesity; 12 with morbid obesity. Longitudinal study: 5 men, 17 women treated with surgery and 9 treated with diet 5 men, 4 woman. | Ortega 2013          |
| miR-616-5p  | o | Plasma | FHS Offspring Cohort, n=2317, Validation youth cohort: n= 90 ob/ow. Initial study RNAseq: n=40, 68.8 yr, BMI 28.2, 50% female, 50% with CVD                                                                                                                                                                    | Shah 2017            |
| miR-625     | o | Plasma | 70 pregnant Caucasian women; 20 pregestational obesity, 25 gestational obesity, 25 normal pregnancies                                                                                                                                                                                                          | Carreras-Badosa 2015 |
|             | d | Plasma | Array: 32 white men (12 control; 12 with obesity, 8 with morbid obesity). RT-qPCR: Replication in 80 patients: white men: 49 control; 19 with obesity; 12 with morbid obesity. Longitudinal study: 5 men, 17 women treated with surgery and 9 treated with diet 5 men, 4 woman.                                | Ortega 2013          |
| miR-636     | o | Serum  | Chinese adults. Arrays: 56 patients with obesity and 56 control. RT-qPCR Validation: 107 control and 123 subjects with obesity                                                                                                                                                                                 | Wang R 2015          |
|             | o | Plasma | Array: 32 white men (12 control; 12 with obesity, 8 with morbid obesity). RT-qPCR: Replication in 80 patients: white men: 49 control; 19 with obesity; 12 with morbid obesity. Longitudinal study: 5 men, 17 women treated with surgery and 9 treated with diet 5 men, 4 woman.                                | Ortega 2013          |
|             | d | Plasma | *in morbid obesity vs control. Array: 32 white men (12 control; 12 with obesity, 8 with morbid obesity). RT-qPCR: Replication in 80 patients: white men: 49 control; 19 with obesity; 12 with morbid obesity. Longitudinal study: 5 men, 17 women treated with surgery and 9 treated with diet 5 men, 4 woman. | Ortega 2013          |
| miR-651     | o | Serum  | 12 women with PCOS, 12 control women, 12 men                                                                                                                                                                                                                                                                   | Murri 2018           |
| miR-652     | d | Plasma | 70 pregnant Caucasian women; 20 pregestational obesity, 25 gestational obesity, 25 normal pregnancies                                                                                                                                                                                                          | Carreras-Badosa 2015 |
| miR-654-5p  | d | Serum  | Chinese adults.. Arrays: 56 patients with obesity and 56 control. RT-qPCR Validation: 107 control and 123 subjects with obesity                                                                                                                                                                                | Wang R 2015          |
| miR-660-5p  | d | Serum  | 12 Italian children with obesity, 6 with insulin resistance, 6 with insulin sensitivity                                                                                                                                                                                                                        | Masotti 2017         |
| miR-664b-3p | o | Plasma | FHS Offspring Cohort, n=2317, Validation youth cohort: n= 90 ob/ow. Initial study RNAseq: n=40, 68.8 yr, BMI 28.2, 50% female, 50% with CVD                                                                                                                                                                    | Shah 2017            |
| miR-671-5p  | o | Serum  | 12 women with PCOS, 12 control women, 12 men                                                                                                                                                                                                                                                                   | Murri 2018           |
| miR-744-5p  | d | Serum  | 12 women with PCOS, 12 control women, 12 men                                                                                                                                                                                                                                                                   | Murri 2018           |
| miR-877-5p  | o | Serum  | 12 women with PCOS, 12 control women, 12 men                                                                                                                                                                                                                                                                   | Murri 2018           |
| miR-933     | o | Serum  | Chinese adults. Arrays: 56 patients with obesity and 56 control. RT-qPCR Validation: 107 control and 123 subjects with obesity                                                                                                                                                                                 | Wang R 2015          |
| miR-1231    | d | Plasma | 20 Italian children, 10 with normal weight, 10 ob/ow                                                                                                                                                                                                                                                           | Iacomino             |

|                    |   |        |                                                                                                                                             |               |
|--------------------|---|--------|---------------------------------------------------------------------------------------------------------------------------------------------|---------------|
|                    |   |        |                                                                                                                                             | 2016          |
| <b>miR-1537</b>    | o | Serum  | 12 women with PCOS, 12 control women, 12 men                                                                                                | Murri 2018    |
| <b>miR-1539</b>    | o | Serum  | 12 women with PCOS, 12 control women, 12 men                                                                                                | Murri 2018    |
| <b>miR-2355-5p</b> | o | Plasma | 20 Italian children, 10 with normal weight, 10 ob/ow                                                                                        | Iacomino 2016 |
| <b>miR-4446-3p</b> | d | Plasma | FHS Offspring Cohort, n=2317, Validation youth cohort: n= 90 ob/ow. Initial study RNAseq: n=40, 68.8 yr, BMI 28.2, 50% female, 50% with CVD | Shah 2017     |

o= overexpressed

d= downregulated
