# Supplementary material
Source: publisher figshare collection journal article supplement (https://tandf.figshare.com/articles/dataset/_/9879284)
Supplement: Supplementary file 5 [file 1]

Archive with 4 entries (4 files):
- Supplemental_Material_1._PRISMA_checklist.pdf
- Supplemental_Material_2._Summary_of_included_studies_and_miRNAs_dysregulated_in_obesity..pdf
- Supplemental_Material_3._Results_from_bioinformatic_analyses.pdf
- Supplemental_Material_4._QUADAS.pdf
